# Supplementary material for: Tuning of motor outputs produced by spinal stimulation during voluntary control of torque directions in monkeys
Source: eLife. 2022 Dec 13;11:e78346. doi: 10.7554/eLife.78346 (PMC9747157; doi:10.7554/eLife.78346)
Supplement: Figure 2—source data 1. [file elife-78346-fig2-data1.xlsx]

## Sheet: Data
Data used to generate polar plots in Figure 2D.
Spinal PD				Background EMG PD				Normalized Spinal PD
	Facilitation	Suppression			Facilitation	Suppression			Facilitation	Suppression
Monkey H	304.95	57.582		Monkey H	16.785	15.7169		Monkey H	351.026	138.984
	21.2275	77.1655			14.3327	14.1309			323.383	349.676
	258.172	21.7277			15.7169	9.23186			346.09	78.8877
	251.991	135			14.1309	356.016			339.499	119.472
	315.516	23.084			11.4211	8.65763			318.858	332.535
	7.84449	27.3737			16.8182	6.4366			250.711	54.0248
	53.3654	0			20.1985	10.3239			335.768	56.0081
	87.4014	26.0443			15.9864	3.54325			265.745	74.3596
	319.555	359.81			356.172	359.531			337.502	302.244
	338.208	315			352.118	4.46333			333.838	355.455
	335.516	353.168			356.016	330.749			312.105	337.883
	315.804	49.7494			7.20239	330.862			315.114	97.1205
	308.281	93.1665			10.9574	333.695			331.537	320.226
	311.262	299.027			9.25037	326.492			55.8532	346.541
	104.892	28.8252			8.90915	334.8			340.219	96.5036
	280.893	26.9033			9.48014	330.895			327.852	101.618
	162.268	45			10.3239	330.64			323.283	105.529
	344.691	269.947			4.90556	327.703			340.533	106.28
	45.9019	331.944			6.06691	336.489			311.556	355.182
	317.981	315.392			359.122	337.509			337.037	347.374
	341.759	314.813			3.40549	299.356			321.967	288.291
	131.315	45			4.46333	307.88			139.88	344.26
	221.46	264.303			330.749	304.077			149.167	309.513
	311.474	290.771			335.706	304.23			282.039	342.586
	236.607	45			330.862	308.496			281.802	301.443
	311.197	352.068			333.695	301.209			267.346	17.6026
	298.371	45			324.534	303.382			262.8	354.984
	279.213	45			327.108	299.471			155.783	333.679
	276.478	46.411			321.364	300.131			321.98	350.13
	290.168	300.709			318.631	305.527			348.782	325.804
	22.345	288.033			326.492	300.659			352.171	50.6731
	297.579	92.0003			317.36	48.0034			315.28	265.185
	284.458	127.33			316.606	86.5466			340.732	244.372
	288.273	103.088			324.99	82.0022			159.295	261.598
	308.307	135			327.774	74.4273			302.286	199.498
	284.24	106.707			332.684	78.6218			352.592	331.904
	304.644	0			327.606	71.7092			350.603	342.117
	294.702	58.2238			332.735	73.9633			359.893	354.45
	106.826	21.4743			326.946	71.9614			358.456	355.437
	120.062	36.3283			330.895	53.7425			351.83	358.269
	254.973	3.40303			332.934	61.9602			340.3	352.815
	256.792	135			334.991	3.96131			337.385	353.96
	237.986	0			330.64	342.397			357.17	356.978
	234.285	345.118			331.485	350.135			338.594	334.248
	122.82	297.959			327.037	324.28			332.622	336.911
	295.337	316.181			333.357	326.051			339.745	352.942
	326.325	301.61			337.543	335.806			175.892	355.968
	325.926	0			333.755	309.327			241.454	327.928
	285.844	141.208			330.564	236.023			287.887	355.514
	318.717	135			337.985	250.628			292.342	294.204
	136.805	136.676			337.509	235.078			305.952	359.496
	310.648	45			302.346	205.502			158.172	342.198
	241.442	315			299.156	197.003			316.209	330.432
	308.857	149.215			307.88	177.311			339.031	292.122
	290.632	164.045			298.04	181.928			347.257	293.036
	284.579	171.015			293.976	176.565			339.484	352.484
	304.057	172.258			288.646	176.821			341.112	254.351
	289.813	198.971			289.92	200.702			198.896	358.545
	289.949	228.826			291.493	203.544			275.942	359.451
	285.441	142.077			293.612	149.263			299.871	349.767
	274.934	148.031			294.635	154.071			337.017	356.736
	277.255	148.011			299.869	151.033			291.542	354.949
	292.064	144.195			294.894	169.947			305.87	354.353
	275.31	150.653			296.716	173.742			312.769	347.903
	268.047	165.218			295.425	172.275			326.521	346.919
	278.901	170.327			299.155	174.359			22.7742	337.855
	323.121	135			308.496	167.072			359.427	323.483
	115.357	179.185			299.464	183.671			327.401	354.467
	182.662	225.023			301.209	189.504			349.753	343.682
	231.269	134.266			303.382	200.062			261.729	356.956
	231.812	207.61			299.471	208.115			347.754	87.5764
	246.082	183.901			300.131	201.703			329.806	348.724
	102.299	177.566			304.127	207.134			352.142	325.946
	262.84	124.399			306.631	192.278			195.583	335.342
	286.694	131.064			307.662	198.028			187.24	355.389
	295.709	175.121			308.452	182.637			306.46	359.243
	273.424	184.292			293.94	180.235			331.871	334.861
	294.829	90			313.717	195.649			335.534	311.037
	139.555	196.414			300.659	197.869			222.603	328.053
	285.97	130.035			48.0034	130.584			333.252	350.434
	103.14	144.468			59.4374	154.701			287.634	342.928
	157.66	131.456			94.634	134.72			355.381	335.278
	104.751	183.827			75.2658	142.344			356.847	337.709
	352.52	355.956			95.633	140.166			341.721	353.696
	12.242	146.363			96.3002	142.189			259.965	320.002
	4.74772	161.534			64.8769	142.426			262.671	341.228
	30.9803	139.441			53.9633	144.492			291.949	344.555
	143.606	137.398			71.7092	143.044			298.459	352.89
	240.711	135.009			73.2884	147.106			280.834	345.713
	110.942	129.033			58.8448	142.113			325.61	356.186
	250.557	121.131			87.6318	143.276			303.902	354.396
	257.874	101.14			73.9633	137.657			343.953	343.497
	70.1209	181.477			66.478	150.341			329.263	356.69
	217.522	151.896			54.7599	157.429			277.397	334.427
	225.99	180.374			71.9614	162.75			327.884	354.212
	2.87303	302.822			71.3309	319.14			335.193	357.464
	8.17899	344.166			62.3091	322.313			313.555	352.088
	4.67606	315.814			51.9075	318.858			295.427	356.484
	143.3	45			60.3607	317.424			237.159	351.889
	352.549	297.988			57.1125	309.264			326.055	352.511
	346.006	179.893			310.157	213.946			309.114	348.873
	322.769	187.176			356.248	148.712			319.687	355.727
	9.7624	147.426			346.988	172.084			322.185	41.865
	312.324	129.203			312.897	133.814			329.854	63.0346
	344.005	135			322.913	125.086			358.024	12.4959
	313.955	299.675			346.554	300.432			329.297	14.4264
	346.749	125.832			0.599776	5.15396			338.62	20.9371
	299.132	45			309.379	20.7853			350.147	22.501
	240.789	105.345			339.06	20.0866			337.526	0.279079
	340.746	6.27376			352.992	31.4123			357.854	310.537
	323.653	135			353.846	48.1474			333.136	22.4185
	332.335	67.3404			340.193	66.2558			270.377	15.4569
	190.838	3.8395			355.255	52.8027			356.988	50.8597
	252.573	47.7267			13.2585	79.6739			330.927	43.9968
	174.332	89.2704			347.092	47.9072			340.605	40.7832
	357.334	146.169			309.893	52.2002			218.706	21.0853
	255.787	46.8625			309.327	56.4281			322.424	60.5727
	342.009	55.5224			327.04	72.5946			349.666	28.085
	300.394	101.843			65.7245	49.0035			359.405	131.039
	288.186	135			316.315	14.6306			311.322	117.997
	293.359	128.028			317.825	9.03365			334.396	25.2821
	220.581	94.3058			357.978	22.0456			316.032	35.5192
	0.382413	0			0.0176563	24.7217			258.316	4.05696
	270.007	10.5917			296.755	32.8828			319.802	41.4829
	228.039	50.0714			300.405	48.3691			354.862	215.79
	267.506	49.887			238.277	56.1906			351.175	4.1736
	228.315	6.03464			232.934	46.0331			305.329	19.1083
	313.161	78.1519			242.577	52.2124			187.735	31.136
	247.475	32.1836			250.628	50.9554			238.169	17.6241
	216.358	131.533			234.637	58.7235			352.618	21.8533
	143.148	52.1802			243.182	67.6249			314.947	38.464
	142.987	86.9754			240.316	48.9684			351	9.9136
	181.711	105.106			249.762	112.217			296.294	120.678
	181.139	100.509			242.679	114.796			352.988	24.2147
	184.224	103.673			263.391	107.487			337.449	85.2583
	205.177	136.143			239.568	101.175			220.674	86.8526
	173.193	114.65			229.291	106.901			354.475	1.08455
	200.167	101.556			216.214	107.16			313.748	41.3631
	192.842	130.256			223.578	99.8394			347.737	93.9691
	126.289	94.9431			208.893	111.446			262.574	52.8398
	201.972	111.673			234.088	114.983			342.697	120.369
	180.695	84.7985			205.502	110.371			351.87	118.994
	162.346	107.557			208.792	113.345			236.32	72.2602
	210.375	122.396			197.003	113.019			344.209	1.7023
	162.596	109.384			227.169	111.92			350.939	25.9395
	91.339	100.24			214.18	108.152			345.346	72.8093
	176.396	115.455			210.341	111.84			163.612	38.007
	163.181	101.534			214.068	105.05			193.857	34.9678
	181.591	103.021			221.904	111.132			300.753	7.74925
	183.451	99.3886			221.266	106.877			348.397	30.4166
	179.166	92.7415			209.312	103.869			303.38	9.37685
	217.275	315			219.251	274.149			351.265	3.61438
	180.45	135			211.153	127.469			324.006	40.8506
	312.041	315			177.311	283.177			355.38	7.5308
	305.765	304.345			181.928	308.618			353.11	31.8227
	159.524				180.903				357.964
	202.887				178.082				350.704
	182.555				181.389				344.219
	193.547				189.516				350.928
	198.164				190.76				334.384
	213.001				198.624				344.802
	184.24				194.093				261.832
	180.014				202.489				169.614
	201.233				203.379				193.923
	172.566				199.43				261.022
	113.153				202.776				145.272
	210.505				213.517				288.165
	169.392				198.465				6.89482
	181.872				201.267				242.455
	64.0432				205.338				237.861
	210.541				202.932				304.095
	168.054				205.629				33.1669
	202.678				213.012				71.415
	216.076				210.385				308.602
	208.565				198.76				297.323
	350.566				149.263				302.011
	272.026				151.033				95.983
	155.707				156.302				271.413
	128.605				177.284				151.945
	149.432				175.036				339.785
	199.913				176.243				39.835
	203.592				172.714				338.353
	132.662				176.631				126.852
	181.415				174.844				8.30195
	198.134				171.001				0.97713
	74.6369				176.321				15.4109
	188.162				177.037				14.6243
	130.435				170.632				237.966
	203.182				162.661				43.7027
	207.466				167.072				63.0259
	356.373				170.719				29.4854
	182.536				173.266				256.887
	192.067				175.032				71.8973
	172.021				177.159				167.422
	165.499				174.324				52.097
	214.244				175.854				162.925
	341.87				208.115				183.91
	148.766				203.436				3.64289
	239.721				207.134				162.762
	224.189				192.278				154.029
	228.393				189.451				82.9395
	231.956				198.028				295.436
	2.04354				174.308				35.8485
	53.0692				174.9				21.0921
	223.76				189.884				346.15
	178.539				185.922				239.314
	134.976				180.029				47.4415
	217.849				177.119				14.969
	263.894				187.972				234.669
	251.84				195.649				0.364756
	239.704				183.302				29.2294
	171.573				180.573				70.5835
	207.767				183.642				13.3723
	127.844				191.551				134.73
	192.281				199.294				123.837
	157.106				179.657				24.8059
	346.382				130.584				1.1663
	15.3751				154.701				4.03151
	134.641				140.166				7.404
	102.343				148.594				14.3775
	147.585				145.007				7.60916
	143.126				142.022				5.69069
	130.404				142.666				9.80508
	45				142.426				201.303
	143.86				142.645				120.993
	343.197				144.492				23.6699
	324.563				143.044				30.8784
	125.018				142.321				6.57109
	194.155				137.657				27.133
	135.26				143.39				11.1256
	14.5528				138.233				40.5217
	134.894				150.685				40.3938
	147.164				147.089				185.654
	135.569				144.63				9.27041
	270.935				157.429				17.0348
	153.493				150.35				38.3903
	315.988				330.641				133.756
	95.4003				291.789				32.5869
	302.494				287.488				31.9114
	295.778				138.65				38.9416
	301.95				133.814				33.9279
	210.246				144.55				33.8757
	325.505				125.086				40.7292
	18.1947				184.337				75.9222
	289.561				270.033				56.1912
	105.028				164.275				56.4019
	297.92				259.688				24.125
	310.027				11.2738				215.798
	343.716				5.15396				2.57809
	73.2248				68.6984				1.10404
	92.2957				69.2837				1.21465
	346.92				32.1206				198.705
	14.6615				26.2644				181.519
	346.785				24.6078				56.4982
	269.673				66.2558				0.0750779
	3.22013e-16				56.6204				113.505
	232.342				72.5946				3.1431
	220.623				56.7986				15.0056
	57.6748				40.1255				157.128
	82.804				35.3711				168.136
	85.6362				38.5587				65.6954
	54.8298				63.5652				200.419
	2.53335				38.5276				19.5285
	37.7583				42.3782				38.2325
	355.925				14.6306				298.753
	358.785				9.03365				338.562
	324.644				22.0456				4.52642
	306.143				40.3582				23.012
	50.987				57.8767				314.8
	82.5027				56.5492				322.177
	41.4542				43.4904				203.417
	25.2852				34.5809				159.747
	39.382				29.2338				163.825
	12.7088				28.4895				17.5493
	267.371				56.1906				47.4329
	229.484				52.2124				47.0775
	246.721				50.9554				341.295
	237.78				67.6249				349.752
	231.139				53.0715				302.599
	68.9052				45.5692				265.785
	81.8135				43.033				25.9536
	81.7527				41.9189				10.1482
	54.7564				50.298				211.181
	62.9516				42.8261				177.271
	79.5805				45.0911				195.766
	259.413				107.487				170.156
	282.069				106.901				178.067
	287.875				107.16				23.3361
	120.755				118.026				38.7805
	106.992				116.065				39.8338
	282.594				111.439				4.45838
	275.577				115.664				20.1255
	313.867				99.8394				34.4893
	286.698				111.446				151.925
	295.546				114.983				175.169
	291.496				113.345				180.716
	307.638				111.92				2.72836
	286.85				108.152				171.156
	289.221				111.84				159.913
	296.439				111.132				214.027
	128.554				113.808				175.251
	85.0131				110.629				180.563
	113.889				103.78				178.151
	91.0303				106.229				195.718
	142.112				103.869				178.698
	264.948				110.183				177.381
	139.078				102.824				185.307
	308.476				224.714				14.7457
	284.438				155.28				10.1088
	114.505				112.496				38.2429
	284.393				277.611				154.765
	288.308				283.975				36.2538
	307.468				296.98				83.7617
	293.752				127.469				129.158
	264.376				40.9757				2.00932
	185.01				283.177				6.78188
	101.803				292.189				4.33251
	93.7601				259.837				10.4881
	226.785				325.763				166.283
	279.458				118.207				223.4
	93.8903				308.618				161.252
Monkey W	91.0215	0.430279		Monkey W	15.9939	15.9939		Monkey W	342.965	344.436
	223.226	358.572			0.943635	13.4976			347.162	359.056
	16.1262	0			15.7195	0.943635			357.464	358.114
	27.0025	61.2691			10.3322	21.4455			339.089	19.3107
	349.624	46.6484			26.5919	19.0825			341.197	23.6794
	1.53603	12.3842			18.5707	14.2705			224.479	31.3478
	31.6423	16.0191			27.771	15.958			243.3	20.5034
	11.4168	35.0363			24.2544	15.6451			188.956	356.261
	20.8699	25.2153			23.4062	17.8531			194.058	33.1713
	350.123	50.8396			10.651	20.6918			144.258	41.5482
	40.9491	44.1424			25.5706	27.2773			165.771	113.341
	260.58	45			23.6084	26.9593			358.344	58.0395
	348.769	47.7205			26.6705	28.9868			320.205	69.2422
	290.846	354.527			32.2908	345.056			304.433	58.6474
	8.84401	3.04015			29.7547	343.729			348.949	108.986
	345.569	0			27.9818	336.321			99.4009	37.2249
	2.06178	15.802			20.865	344.454			316.918	349.04
	200.799	7.12145			336.321	346.618			243.703	336.666
	223.861	348.357			340.561	343.799			343.866	353.116
	186.67	332.868			357.715	336.607			302.882	342.597
	187.485	341.844			353.426	329.229			334.751	145.279
	120.865	4.77484			336.607	331.604			331.548	133.29
	135	11.1061			329.229	329.558			205.726	114.346
	354.928	80.7983			329.17	327.457			306.144	340.965
	331.881	40.0595			333.537	342.02			157.181	87.5672
	295.962	45			335.758	335.758			240.204	76.1562
	290.785	45			346.353	346.353			302.332	331.566
	326.943	86.5042			337.994	337.519			286.649	356.953
	81.5234	0.502369			342.123	323.277			329.086	344.028
	289.188	298.003			332.269	308.963			338.694	270.045
	206.98	315.111			323.277	308.29			322.108	124.864
	305.624	285.886			321.758	309.22			354.804	247.583
	258.98	303.847			316.098	310.73			342.592	349.508
	283.249	282.392			308.498	299.796			341.399	353.949
	279	93.1852			307.452	307.906			334.213	176.44
	312.56	77.8903			312.115	304.6			357.023	164.595
	169.816	57.1099			324.09	302.764			341.201	167.798
	270.422	287.783			324.277	306.818			341.828	352.681
	107.911	45			310.73	317.433			53.6319	154.974
	180	34.0303			299.796	317.874			49.8794	307.054
	353.527	57.9912			307.635	37.2067			43.096	358.319
	250.238	112.862			307.906	41.0741			317.231	357.579
	231.249	64.0231			304.6	92.4569			112.615	184.393
	271.85	123.297			302.764	84.4728			294.724	158.474
	285.595	71.638			306.901	59.1937			355.752	184.529
	279.541	85.1412			317.433	75.5293			303.825	353.807
	306.522	63.0271			311.718	66.0741			298.468	355.031
	294.568	112.147			311.976	73.0728			351.034	359.373
	294.827	85.3938			313.428	68.5013			140.355	351.95
	339.613	93.9166			316.699	72.4896			333.126	231.63
	305.738	87.4388			331.524	71.2638			308.08	168.969
	233.74	91.2456			37.2067	83.2062			358.017	345.725
	130.571	83.0663			39.7344	79.5323			189.578	169.527
	106.19	26.5374			63.8572	42.5092			354.129	344.268
	106.796	48.3448			65.2193	43.483			348.495	162.612
	85.1017	45.5824			77.8176	41.7122			352.971	189.748
	100.203	112.705			53.9408	28.9378			346.245	354.837
	180	79.9524			66.0741	46.9209			358.32	350.77
	65.5225	91.5976			68.4991	61.7429			192.777	356.131
	313.731	126.009			73.0728	68.436			324.578	349.514
	231.672	103.039			68.5013	32.1968			128.378	353.487
	225.03	141.687			72.4896	35.2568			358.301	349.553
	64.4077	240.567			83.2062	330.522			340.767	317.808
	104.77	107.005			77.7754	342.141			350.503	309.278
	93.8889	230.804			75.1192	343.221			347.083	240.096
	101.581	226.63			65.4574	237.123			343.135	155.106
	127.297	251.286			70.9042	235.184			326.573	216.675
	67.0365	274.679			62.0655	228.459			353.756	221.93
	114.769	250.816			49.1659	232.148			142.452	60.9408
	107.625	231.246			78.6523	228.273			337.318	343.464
	309.632	225.321			64.1104	231.372			338.298	357.939
	330.856	52.2004			29.5205	235.761			307.415	348.904
	358.841	38.7485			68.436	234.154			351.615	326.603
	253.124	42.0129			31.247	234.215			355.927	318.562
	251.857	247.915			33.2841	236.003			346.536	327.584
	190.45	229.432			19.6288	236.752			347.684	338.422
	17.0848	46.9931			35.2568	252.019			354.124	352.805
	3.83591	244.769			310.204	238.515			164.094	330.67
	4.54914	256.737			314.67	236.253			174.211	332.929
	19.0549	243.97			335.959	236.626			253.42	356.064
	299.372	183.322			342.141	236.267			353.235	333.817
	95.8365	225.762			343.221	227.443			146.632	319.962
	278.821	227.391			344.097	229.812			349	341.272
	290.798	52.5173			295.046	228.124			350.054	353.878
	292.948	28.0157			349.123	229.542			354.922	271.749
	280.326	51.8685			341.858	227.339			356.584	343.581
	228.626	232.784			237.593	230.202			200.863	359.392
	17.4774	226.594			237.123	232.788			348.68	35.7864
	215.339	220.514			242.214	225.483			256.012	353.59
	259.834	207.516			232.56	208.143			295.614	348.873
	265.722	209.365			252.667	199.846			280.559	326.318
	237.496	212.348			224.756	203.732			202.728	76.7099
	187.195	198.264			239.115	195.498			357.761	345.075
	225.227	194.544			227.21	202.594			138.324	39.8236
	57.851	61.0548			228.273	189.425			139.592	27.5659
	249.104	0			227.797	191.031			314.209	0.0611247
	229.89	199.851			235.761	198.392			247.055	19.3912
	222.649	180			234.154	194.275			204.186	7.36216
	227.186	201.066			234.215	196.58			141.829	30.1478
	271.228	59.8018			242.331	250.275			325.781	16.8651
	230.015	280.322			243.769	236.504			356.842	18.0407
	264.737	233.387			262.192	229.184			321.73	18.7337
	236.02	226.228			237.7	222.685			317.403	9.47177
	274.479	244.771			239.959	226.435			359.249	4.55736
	251.674	212.308			239.498	228.039			323.872	12.6148
	61.9802	225			229.203	216.373			320.194	6.82069
	197.927	226.846			233.348	218.3			342.129	20.7845
	5.12949	12.6521			236.752	210.041			322.667	71.788
	250.32	40.7983			252.019	211.051			343.312	38.8241
	233.372	272.461			252.605	214.021			354.825	12.4443
	241.51	215.406			251.006	220.568			327.295	9.61186
	238.699	162.674			251.616	171.904			352.036	39.0741
	250.247	173.649			267.112	177.518			281.335	16.8925
	233.019	169.753			226.987	167.55			218.379	21.427
	212.295	175.362			245.722	160.868			336.53	16.175
	225.806	176.11			232.05	161.529			335.199	8.03935
	9.89458	154.821			227.443	151.106			32.5421	3.53401
	233.396	140.528			226.734	151.014			316.921	4.86175
	205.441	166.046			228.124	161.816			316.146	3.87023
	230.033	149.131			229.542	155.644			327.374	83.767
	232.85	134.974			227.339	145.421			249.914	33.0315
	215.011	164.398			236.714	160.828			335.78	29.8547
	192.882	162.618			245.467	204.81			229.947	57.5726
	222.571	148.297			230.956	199.019			143.486	70.8419
	235.632	135			232.848	254.904			301.105	106.431
	229.938	146.451			234.011	351.346			315.789	16.1019
	232.152	191.198			245.617	334.523			301.445	46.2202
	212.796	140.622			225.113	278.693			288.806	18.6681
	217.582	45			202.211	344.059			309.315	2.97248
	198.858	288.927			204.734	255.425			118.291	11.9122
	209.893	322.839			193.097	200.021			273.572	6.25421
	225.395	27.7363			204.285	44.2724			75.0276	20.4846
	231.1	46.1264			222.015	48.1876			222.282	7.34455
	3.94029	48.2854			199.846	46.3969			0.406746	2.58224
	233.826	45			201.232	40.2691			16.6703	9.51823
	214.455	28.7344			195.347	39.8309			323.032	8.61587
	222.208	9.91555			202.913	43.3125			3.87134	2.7658
	9.70978	2.12116			195.498	43.5587			339.472	1.45851
	207.673	11.189			190.984	43.6048			15.3785	4.4865
	210.877	21.7479			189.425	43.3257			236.972	43.8182
	208.448	32.8955			191.031	40.0909			322.099	4.20323
	213.31	17.0221			192.132	46.3519			258.556	3.54249
	259.897	22.3506			185.657	49.4213			317.587	18.3358
	216.594	45			199.414	36.9626			25.7588	8.62723
	201.556	45.6103			200.423	49.5468			0.444725	8.5459
	220.65	135			203.09	54.5931			45.8921	58.4402
	201.204	45.5091			193.686	39.1807			22.9131	2.20323
	90	355.984			196.58	42.2349			196.533	14.4943
	258.498	18.4142			250.275	44.597			90.8365	14.5817
	245.602	1.77705			240.259	41.8146			42.3331	3.715
	230.058	358.815			236.823	43.5784			41.577	4.22949
	264.016	21.9474			258.949	40.6749			7.28406	3.56988
	15.8155	36.3464			229.184	42.4681			46.2623	33.5019
	211.685	45			222.685	40.4779			113.926	122.818
	249.647	120.552			220.757	119.017			240.658	1.88848
	242.207	117.721			229.181	114.095			163.171	4.73085
	236.175	124.101			227.68	118.674			152.54	8.03737
	358.656	135			216.373	34.1466			26.9943	80.4069
	329.355	21.0076			218.3	109.259			18.7697	6.32834
	260.856	180			216.708	99.4535			36.124	313.749
	219.678	121.319			210.041	112.437			56.3926	315.237
	248.066	85.7401			211.051	102.159			4.97103	4.5221
	259.59	105.8			205.551	100.365			65.6032	1.53468
	213.527	100.919			208.746	101.526			28.9729	3.62647
	196.328	105.485			206.274	100.067			245.522	5.4272
	222.796	112.531			220.966	101.905			301.336	100.853
	236.493	111.258			220.81	100.967			290.405	80.5465
	250.406	122.451			226.282	109.215			221.877	8.88177
	226.844	124.883			213.421	118.733			218.573	5.43496
	330.624	106.328			171.904	105.09			170.821	5.41801
	200.639	339.685			157.365	332.077			27.2746	10.6263
	176.833	5.90478			162.869	330.118			13.0559	10.2911
	177.269	341.95			174.414	340.108			12.7408	13.2358
	188.126	339.863			159.369	330.939			21.3067	6.1505
	177.551	307.446			155.636	313.856			28.8969	1.23827
	198.741	301.237			156.208	312.365			2.54481	7.60714
	155.527	279.607			160.605	313.289			34.5203	1.84221
	160.041	45			163.456	328.29			12.1765	8.92349
	164.01				158.08				6.03133
	184.622				157.774				6.66152
	295.437				151.106				0.490997
	180.119				149.655				5.51107
	285.319				145.421				2.78336
	190.244				157.57				15.3704
	190.582				160.844				16.7964
	194.227				161.154				21.1102
	195.599				156.493				9.08552
	45.6733				204.81				32.5932
	350.196				190.314				19.1074
	168.811				180.131				19.2957
	186.268				290.255				16.6893
	264.835				199.019				21.4521
	190.518				254.904				17.4166
	271.904				351.346				21.178
	234.002				36.6488				74.2401
	201.952				359.225				17.1798
	288.169				277.104				1.13272
	284.494				286.733				17.5599
	274.474				272.637				7.5185
	36.4406				258.116				8.22346
	59.1366				279.544				5.34264
	206.359				252.151				5.06773
	280.439				238.437				28.8906
	148.211				261.156				13.0262
	318.065				21.4161				8.4942
	188.245				344.059				142.284
	37.254				255.425				111.055
	287.853				200.021				44.148
	243.112				277.331				9.63722
	187.872				191.03				37.0156
	14.7895				53.0597				54.0398
	203.813				35.9563				4.78055
	243.663				56.1047				1.82945
	201.301				45.2922				15.6826
	358.293				47.6814				24.1241
	6.22506				48.8216				13.4226
	307.704				54.8127				158.72
	222.424				46.5811				43.2733
	292.496				53.1789				13.9641
	266.057				40.2691				2.85568
	300.18				33.0547				28.7575
	45.6697				46.4207				21.9154
	10.9272				47.0548				42.533
	219.569				43.3257				5.93097
	242.105				46.3519				26.8482
	204.934				49.4213				144.331
	279.329				47.9057				30.4644
	334.889				48.5897				139.899
	8.9387				48.7451				32.6744
	121.002				25.8567				29.7382
	265.25				36.9626				33.0725
	268.579				31.9184				39.1056
	36.722				54.5931				159.882
	9.23778				46.5708				65.8165
	351.315				47.8808				197.353
	248.274				40.2174				11.0651
	257.328				45.9253				1.83779
	87.3934				42.2349				42.0021
	332.134				34.3009				296.648
	227.226				44.597				87.8327
	341.68				41.2706				167.857
	25.3412				42.0296				187.558
	249.061				39.2839				156.009
	223.791				40.6749				310.612
	247.318				38.0593				252.892
	264.414				42.4681				175.843
	265.365				40.4779				239.317
	297.043				61.1624				225.787
	296.994				40.91				267.126
	44.693				49.8682				176.243
	299.219				118.674				195.753
	229.075				34.1466				155.512
	85.1964				117.902				231.423
	275.451				98.45				286.299
	291.464				112.437				95.1454
	119.755				113.887				228.288
	87.349				95.3125				236.66
	277.651				101.905				303.435
	294.855				100.967				208.057
	297.905				109.215				211.403
	279.979				114.461				45.1585
	319.855				118.733				297.833
	29.0164				107.682				182.629
	222.48				111.719				300.41
	190.456				332.077				209.777
	310.308				333.778				183.116
	305.951				330.751				209.259
	3.41119				330.869				221.946
	296.294				339.372				224.887
	288.097				331.951				235.881
	293.77				326.396				256.084
	200.38				310.466				180.545
	290.433				314.654				194.929
	183.803				313.856				177.001
	95.8508				312.365				179.028
	267.199				326.094				5.86808
	278.078				322.289				175.746
	266.685				325.24				193.888
	252.107				323.301				188.69
	282.196				332.881				165.518
	82.678				324.387				201.122
	238.576				325.005				110.76

## Sheet: Statistics
Detailed statistics in Figure 2D.
PD	Type of PStEs	Rayleigh test			V-test
		N	P value		N	P value
Spinal PD	Facilitation	603	2.25 × 10-22		603	0
	Suppression	333	2.36 × 10-12		333	2.75 × 10-13
Background EMG PD	Facilitation	603	0.0339		603	0.005
	Suppression	333	0.0063		333	9.02 × 10-4
Normalized Spinal PD	Facilitation	603	6.84 × 10-41		603	0
	Suppression	333	1.51 × 10-75		333	0
