# Supplementary material for: Tuning of motor outputs produced by spinal stimulation during voluntary control of torque directions in monkeys
Source: eLife. 2022 Dec 13;11:e78346. doi: 10.7554/eLife.78346 (PMC9747157; doi:10.7554/eLife.78346)
Supplement: Figure 3—source data 1. [file elife-78346-fig3-data1.xlsx]

## Sheet: Data
Data used to generate bar plots in Figure 3D.
Spinal Facilitation					Spinal Suppression
< 150 μA	150-750 μA	750-1350 μA	³ 1350 μA		< 150 μA	150-750 μA	750-1350 μA	³ 1350 μA
0.784824	7.29798	42.4247	41.0998		1.50691	0.815211	0.190573	0.257255
0.207597	13.1193	38.7139	12.1468		0.0413204	1.08713	0.00292102
1.19129	20.052	28.8594	25.0789		0.929727	0.418087	0.0795438
0.00962319	5.04569	9.50922	29.032		1.08718	1.13409	0.122344
0.161667	0.0810967	1.23526	45.9285		0.0164132	0.0926068	0.0750555
0.275105	0.0285776	2.80489	13.381		0.761937	0.00120506	0.000886323
0.147681	0.00917573	1.09546	23.7172		0.00418708	0.000155808	0.0176016
0.0021214	3.99096	0.00818732	5.28184		1.38774	0.00443331	0.00235914
0.025508	0.252628	5.23395	144.13		1.40667	0.00609466	0.00885714
0.16062	9.80047	0.108248	5.57913		0.0546387	0.007727	0.064421
0.686191	5.92286	0.0147363	5.96879		0.00117064	0.00416066	0.00027151
0.0288749	0.0047449	0.27446	0.736054		9.03628e-05	0.185596	0.0126019
0.129545	0.096414	0.00703478	60.5421		0.0725827	0.38993	0.00547552
0.0146911	1.06223	8.12893	14.6189		0.155098	0.514958	0.0577661
0.051579	1.00894	2.57334	200.303		0.00468617	0.198715	0.0107594
0.00202071	0.437115	1.2922	20.8916		0.143515	0.267905	0.00194752
0.015698	0.110885	28.7133	59.0989		0.319772	0.00892994	0.174049
0.0297996	0.0168243	21.4347	14.7015		0.0824448	0.0896806	0.119273
0.0488423	0.596744	18.196	63.2776		0.835422	0.0042909	0.00343424
0.599358	0.0202257	5.93091	3.31475		1.05719	0.00672998	0.0284186
0.00237893	0.0024113	2.87609	93.6624		0.0178286	0.0140977	0.0033316
0.00464327	0.234644	7.08245	8.69066		0.514909	0.0121764	0.00782428
0.00203663	0.00357349	5.41558	64.8356		0.0299065	0.000103279	0.00126684
0.00770815	0.479677	0.0268911	1.26025		2.28714	0.0197824	0.0160583
0.0076019	0.0131854	9.96702	11.5367		0.94994	0.601317	0.000563842
0.0134353	0.0401427	0.187436	4.70532		0.0489139	0.053741	0.00257543
0.382796	3.49909	0.0369417	41.7854		0.00876022	0.165944	0.000915103
0.00654275	5.49503	0.103059	5.65177		0.160625	0.12738	0.00404015
0.299593	8.83524	0.0516648	22.6905		0.0288352	0.313111	0.00289989
0.0263024	2.11616	8.76546	0.967704		0.0274929	0.0628676	0.237001
0.379129	0.0168819	4.11465	66.6256		0.0224383	0.0070679	0.532419
0.000777057	0.0574005	2.37325	7.85634		0.0565904	0.012995	0.0735727
0.0809267	0.0163513	52.6743			0.122052	0.0141855	0.159372
0.537759	3.83586	39.2551			0.0112958	0.00458441	0.000528877
0.0908908	0.364114	31.5831			1.47437	0.00603479	0.877347
2.90864	5.06755	5.60336			0.0946913	0.0244171	0.259118
0.00129983	3.02697	3.86683			1.0635	0.559694	0.0459382
0.0107978	0.0025662	8.93303			0.023563	1.46922	0.00748604
0.0222391	0.398001	5.39379			2.03488	1.57855	0.198
0.0173887	2.06426	0.249415			1.5659	1.22383	0.0976546
0.000261703	1.01207	4.82156			0.0643187	0.142194	0.179637
0.0041939	0.00362973	0.358284			0.00136805	0.0939628	0.00271962
0.00599059	0.901306	0.0264544			0.101171	0.00147022	0.402518
1.35354	0.6322	0.295067			0.00488332	0.00586369	0.0980498
0.0112417	0.0685607	0.100659			0.000514233	0.000995569	0.298029
0.369836	2.28892	8.80802			0.0439484	0.00307514	0.355303
0.0280283	0.0182299	4.14244			0.0107911	0.00345294	0.58582
0.639699	0.00157525	2.12594			1.49571	0.14187	0.0124273
0.00109861	0.276748	28.468			0.0530473	0.215809	0.703335
0.120434	0.00925952	18.328			0.856207	0.711002	0.252308
0.0395238	1.00887	17.6209			0.087419	0.552168	0.82716
0.192163	0.00145983	4.0633			0.31593	0.123468	0.548764
0.726355	0.0656984	0.962854			0.00724597	0.00132735	0.101222
0.00794409	7.78051	2.30593			1.07945	0.000197207	0.740311
0.00488356	9.40637	0.558368			0.94123	0.00167375	0.784189
0.011004	17.4632	0.0125094			0.0533333	0.0207349	0.00263999
0.0890207	2.29979	1.41426			0.0220822	0.00137465	0.89443
0.00310808	0.351093	0.0498325			0.0777538	0.299641	0.362781
0.00948974	0.267584	0.0173771			0.0439575	0.143877	0.0109323
0.048083	0.0934803	0.00752848			0.622648	0.108011	0.00227965
0.654522	6.36328	0.00219016			0.0115999	0.0187944	0.00159229
0.0848895	0.931698	5.39625			0.0387413	0.0197461
0.113921	12.1109	2.75446			0.00267338	0.00579634
0.0195745	5.49535	1.60936			1.33676	0.00550089
0.00173545	0.00955785	217.569			0.0148269	0.000117274
0.0130562	0.550596	113.893			0.653949	0.0455291
0.0155929	2.49888	245.665			0.0700617	0.0883294
4.13154	1.4077	1.85312			0.75335	0.0778916
0.0469601	0.911635	5.65297			0.553905	0.824348
72.7608	0.726325	1.52299			0.102248	0.0663089
0.102997	0.0745405	8.69732			0.00203354	0.00139107
0.00355343	2.09073	0.290858			0.0005042	0.00209217
0.223251	0.0208082	6.91972			0.00462884	0.000641285
0.013841	0.00366239	0.244655			0.161185	0.00113382
0.0182799	0.495871	0.0325488			0.0051673	0.00049747
0.0634991	0.000679183	0.142198			0.140511	0.0162607
0.0899798	1.05392	0.0504533			0.00215502	0.00119539
13.0232	0.00705529	21.3973			1.73581	0.0100009
0.399599	0.0323478	3.1614			0.650864	0.00658249
1.72821	4.99285	11.4492			0.0894629	0.00872133
0.312852	7.31372	118.338			0.00716233	1.02322
1.04711	14.2628	96.1207			0.0785424	0.533082
0.389473	2.9986	131.448			0.206596	0.000218998
0.0626349	0.114377	1.87746			0.0015407	0.00080229
0.584449	0.0302184	0.494218			0.0010275	0.122234
0.0842797	0.00955177	0.630229			0.0545267	0.000121963
20.9626	2.5211	0.0190602			0.101799	0.0567249
0.0410194	0.551794	0.0142066			0.733153	0.0166409
0.0371151	5.70274	0.667231			0.0304446	0.0020465
0.023183	2.44461	0.00407859			0.550885	0.00164918
0.038501	0.0137938	0.007464			0.0260429	0.000874666
0.00150566	0.475924	0.0148909			2.76338	0.255606
0.0546003	0.630023	0.00483116			1.94684	0.562748
0.012477	0.00276094	7.66518			0.445243	0.00179738
1.31834	0.314584	0.679583			0.0115851	0.00192815
0.000180218	0.0862332	0.086095			0.0865307	0.467571
0.00225579	0.0621528	27.8097			0.00277759	0.2467
0.0175126	0.289263	21.9327			0.00300276	0.00743462
0.348336	0.0120298	22.1529			0.0541379	0.271315
0.000320973	0.000791584	4.11812			0.00860088	0.316007
0.011439	0.142753	2.77512			0.00604813	0.00134396
0.437785	0.00139543	6.4415			1.96557	0.00604489
0.0509156	0.610565	4.47421			0.089709	0.00191829
2.90685	0.0744263	0.744329			1.19939	0.291118
0.0511556	0.00652705	6.98174			0.105628	0.0838557
0.00478114	167.458	0.69463			2.48172	0.00052473
0.0319795	209.286	0.0930506			1.84857	0.0555858
0.014467	82.727	0.317148			0.770649	0.0599733
0.0447919	36.8523	0.348562			0.0532806	0.000409112
0.483744	3.34394	7.93356			0.0890819	0.09263
0.043508	0.267919	3.26741			0.124182	0.447545
0.10911	0.396397	2.36072			0.00746257	0.226817
0.145262	86.9356	110.112			0.00217815	0.918674
0.237882	0.160059	50.9058			0.154242	0.401001
0.000972619	100.284	54.0803			0.646034	0.433543
0.0340903	62.6058	5.28604			0.00661639	0.0306334
6.16546	1.62953	3.37839			0.997073	0.0015224
0.196648	0.206445	7.16839			0.0588398	0.446705
19.7145	16.5437	7.64794			0.951019	0.559476
0.000508853	0.811087	0.726331			0.635597	0.641146
0.00210094	0.0059665	7.45433			0.34106	0.228118
0.00656913	0.0804619	1.93047			0.0693963	0.0082648
0.0417426	0.0113802	0.312417			0.000236075	0.193681
0.000478365	0.425622	0.747297			1.06458	0.532012
0.000864804	0.0114594	0.794177			2.13997	0.00599857
0.00197977	0.00984659	8.65898			0.320686	0.00371157
0.222385	1.73753	5.12325			0.00259272	0.00128149
0.0030097	0.0101659	2.40692			0.355054	0.00195615
0.0149922	2.2936	54.6816			0.00257279	0.0161777
0.0110222	0.606946	34.2653			0.0394001	0.000475983
0.713357	0.186093	21.1258			0.475117	0.192019
0.00115567	12.726	2.96121			0.0103756	1.98275
1.69728	27.453	1.47885			0.240093	0.21146
0.250768	38.8705	3.23727			0.0113358	0.101148
6.58457	6.24291	1.96276			0.397809	0.421172
0.00420965	6.17033	0.18197			0.484509	0.015773
0.0195041	1.22195	5.17627			0.0211733	0.0970277
0.00261242	0.525056	0.603767			0.0222182	0.40337
0.000993676	13.0394	0.0391093			0.158256	0.268238
0.143256	0.173773	0.196533			1.23017	0.0982396
0.00858138	41.7253	0.121805			0.024134	0.733257
0.0093795	17.4678	5.31173			0.00917542	0.123083
0.0174556	0.00250305	2.28951			0.0175548	0.755544
0.206673	0.0266536	1.25722			1.14865	0.0382983
0.00230599	0.0973713	40.5264			0.0762817	0.104451
0.00157567	0.138232	18.6816			0.53019	0.0444925
0.0159132	0.0027466	11.1355			0.00791708	0.0196128
1.42627	0.000783704	3.49014			0.221661	0.040172
0.00358165	0.228493	1.14792			0.00762017	0.121632
0.000751179	0.0231797	2.94783			0.0013125	0.00395235
0.739807	0.0159591	0.578659			0.29219	0.000473883
0.00958406	0.015368	0.114721			0.118316	0.00100626
4.29758	0.0204347	3.03557			0.00162171	0.00332841
0.00579468	0.0662934	0.273634			0.642131	0.066452
0.0543516	0.0069018	0.0396352			0.641004	0.703032
0.00255682	0.135437	0.344577			0.204119	0.694458
0.0016073	0.140701	0.258069			0.00140884	0.190344
0.362066	0.00406128	4.90902			0.000304843	0.112313
0.012006	5.08788	1.89261			0.513769	0.653415
0.00786222	7.46752	0.683602			0.00826122	0.000472786
0.0214198	15.1973	22.8671			0.00141029	0.108834
0.205533	2.43066	12.4399			0.106434	0.0310949
0.0536006	1.48424	16.461			0.00467084	0.0336256
0.0104594	1.35876	12.9379			0.0741025	0.00858434
0.0102281	0.953236	3.49784			0.0136293	0.00223047
0.605639	3.29364	7.63924			0.0505347	0.00195234
0.0101791	0.357563	0.485243			0.000557388	0.00749347
0.0536938	6.6049	0.113055			0.0443564	0.336864
0.0719446	2.5946	0.773782			0.124062	0.10738
0.00686866	0.0137539	0.0145743			0.187451	0.589878
1.19455	0.433207	0.0198366			0.00648547	0.461438
0.00307673	1.24124	0.212101			0.00425857	0.185256
0.0158633	0.607474	0.0430336			0.0421681	0.272227
0.0186201	0.00185083	14.4476			0.899171	0.101371
0.62818	0.693751	4.56591			0.00369626	0.245644
0.0631709	0.346725	2.93151			0.266237	0.267037
0.00140259	0.103102	11.9691			0.00203717	0.00662646
0.00510585	1.72752	6.50493			0.0579305	0.228604
0.28459	0.170347	7.87472			0.000126843	0.916383
0.0398939	0.00658783	27.6043			0.403652	0.000451334
0.0496009	0.390827	3.5243			0.179602	0.0266639
0.00876826	0.0324245	7.41082			0.000223746	0.0333421
0.0782029	1.22219	0.0485001			0.394116	0.0260156
0.0161075	0.129416	0.52071			0.00918876	0.242404
0.0225074	0.0857464	0.0166708			0.00332048	0.00513984
0.083738	5.70558	0.132228			0.089475	0.00983745
0.0313472	10.7067	0.196667			0.00107859	0.00699039
0.262999	20.6031	0.12084			0.00456107	0.00222032
0.0466609	1.89012	26.8797			0.0541647	0.82246
0.014448	4.64787	10.5525			0.000566553	1.84969
0.0203358	5.95469	2.96289			0.75395	0.956082
0.00641482	3.87653	6.05346			0.00956261	0.000869499
1.69287	3.24818	2.1958			0.322723	3.49414e-05
0.226589	0.261536	4.09188			0.000816148	0.000845262
0.00865068	12.3521	25.9826			0.082812	0.0107242
0.024119	3.14455	1.28034			0.00203231	0.0302169
0.418019	0.00151947	3.34318			1.00907
0.0371377	0.0048547	0.227061			0.000239603
0.0474873	0.657391	0.000475323			0.00388506
0.6527	0.537123	1.34547			0.0067027
0.134554	0.000873301	0.0033104			0.0226745
0.00550187	1.14028	0.0626276			0.00750961
0.0126191	0.138513	0.00373299			0.283617
0.18225	0.0123232	0.000152375			0.00349856
0.126993	1.94986	26.2639			0.487637
0.00964607	0.0684105	6.75943			0.0374676
0.1339	0.0258501	2.17689			0.000550529
0.000445978	0.542335	22.7594			0.00397837
0.13273	0.00421251	14.268			0.000699107
0.487522	1.59929	8.54193			0.00756797
0.0691802	0.0527792	37.263			0.020051
0.0800336	0.0115947	1.29982			0.00110895
0.201919	4.54246	3.15621			0.000425224
0.074432	7.69849	0.293167			0.010831
0.18524	14.0691	0.0158651			0.00624884
0.0492165	2.14771	1.51664			0.00778159
0.0234713	3.21421	0.00458855			0.000672883
9.40449e-05	0.95271	0.00484425			0.249671
0.00305874	1.3147	0.00354506			0.00390284
0.00766964	3.43212	0.00214616			0.0176656
0.0975398	0.132387	38.3386			2.08023
0.174384	7.96571	9.68376			0.0318742
0.778309	1.85628	2.81781			0.523395
0.00294589	0.0202048	7.54541			1.13949
0.0998806	0.0109868	4.47489			0.00577291
0.00277359	0.212357	4.72773			0.849951
0.158798	0.299675	14.9099			0.00186943
0.46505	0.00350191	0.650786			1.08191
0.0821475	0.475434	1.46637			0.00263191
0.0678222	0.00278654	0.304793			0.01151
0.296436	0.000672237	0.00982113			0.0357003
0.191159	0.153101	0.307766			0.0114503
0.313208	0.108559	0.00611637			0.000823173
0.0641155	0.0117207	0.00224834			0.0028019
0.0411935	0.143801	0.00701868
0.000649379	0.00476549	0.000118595
0.00705438	0.962847	22.8205
0.0499737	0.000154218	2.92228
0.000614801	0.0125864	1.2159
0.0265039	3.50773	44.6638
0.0160992	5.18385	23.8535
0.00249188	12.3724	30.1973
0.0130335	2.4936	5.31945
0.0574159	1.24667	2.42783
0.0107744	0.566319	6.36537
0.0846187	0.319467	1.21675
0.0114068	2.65054	0.141886
0.0257125	0.194021	3.19984
0.000730391	4.43899	0.128664
0.132356	1.18758	0.00652442
0.00929073	0.143354	0.15537
0.0601608	0.525321	0.0436972
0.00594428	0.30603	9.67624
0.00211953	0.00754056	2.10954
0.00627993	0.265904	2.74727
0.0284129	0.0206667
0.0263805	0.0050003
0.0283597	0.0492107
0.209776	0.0777308
0.00312461	0.0323297
0.00357258	0.107812
0.0049123	0.0154996
0.0235381	0.122805
0.255094	0.134026
0.0330905	0.0031034
0.174722	3.84635
0.0371077	5.68586
3.44182	14.7001
0.110105	4.41783
0.0168569	0.768163
0.00729968	0.0791283
0.653344	0.0380523
0.0030227	2.97182
0.104957	0.0483142
	6.63763
	1.32213
	0.00164392
	0.0404685
	1.68033
	1.26159
	0.00258727
	0.995961
	0.0329712
	0.0667417
	0.165706
	0.00499528
	0.0555527
	0.159364
	0.0101476
	1.26234
	0.0540587
	0.0315714
	1.87253
	3.70237
	11.2119
	2.50891
	0.761351
	0.123643
	0.0446823
	1.12521
	0.553352
	2.14262
	0.663864
	0.0122588
	0.0125337
	0.00581406
	4.25371
	0.0327649
	1.00092
	0.394942
	0.0787748
	0.0789673
	0.0300849
	1.04103
	0.0399901
	3.65947
	0.023059
	0.0159899
	0.714905
	1.84315
	9.33971
	1.3792
	0.00783947
	0.0164228
	0.0046915
	0.243168
	0.0412374
	0.314702
	0.184357
	0.0298831
	0.00933094
	0.0799633
	2.46194
	0.00539821
	0.357478
	0.00955176
	0.0162592
	0.126393
	0.0133175
	0.0013041
	0.373508
	0.00660138
	1.02994
	0.0258195
	0.0461883
	2.3848
	5.15938
	10.1944
	1.93732
	0.0782565
	0.0458419
	0.0254088
	2.48736
	0.206253
	3.50968
	1.8673
	0.0566225
	0.00634338
	0.161557
	3.46605
	0.066177
	0.33782
	0.0154562
	0.0149213
	0.138427
	0.0157522
	0.00879108
	0.400542
	0.0120956
	1.0057
	0.0471354
	0.0541168
	1.50457
	1.09811
	3.54979
	0.689018
	8.979e-05
	0.893835
	0.138088
	0.847255
	0.329574
	0.0134533
	0.0223362
	0.0751101
	0.891863
	0.00485212
	0.052096
	0.0437222
	0.00734762
	0.133934
	0.00226277
	0.00593303
	0.130005
	0.00291555
	0.406418
	0.0156825
	0.164784
	13.7641
	15.6479
	13.5119
	6.51037
	0.044289
	0.0123823
	9.664
	2.41025
	13.8777
	6.87898
	0.675521
	0.225662
	0.371829
	0.185103
	0.00795132
	0.574739
	0.276118
	0.0413262
	0.774425
	0.104949
	0.0219038
	0.332568
	0.0996068
	0.186825
	0.0105854
	0.554668

## Sheet: Statistics
Detailed statistics in Figure 3D.
Type of PStEs	One-way ANOVA	Pair of post-hoc tests	P value
Spinal Facilitation	F (3, 980) = 38.34		1.99 × 10-23
		< 150 μA vs 150-750 μA	0.1544
		< 150 μA vs 750-1350 μA	1.56 × 10-8
		< 150 μA vs ³ 1350 μA	3.77 × 10-9
		150-750 μA vs 750-1350 μA	3.43 × 10-5
		150-750 μA vs ³ 1350 μA	3.77 × 10-9
		750-1350 μA vs ³ 1350 μA	3.84 × 10-9
Spinal Suppression	F (2, 488) = 4.96		0.0074
		< 150 μA vs 150-750 μA	0.0187
		< 150 μA vs 750-1350 μA	0.0477
		150-750 μA vs 750-1350 μA	0.8568
Since the number of Spinal Suppression of  1350 μA is 1, it was excluded from one-way ANOVA and post-hoc test for Spinal Suppression in Figure 3d.
Tukey-Kramer test was conducted for post-hoc test.
