# Supplementary material for: Tuning of motor outputs produced by spinal stimulation during voluntary control of torque directions in monkeys
Source: eLife. 2022 Dec 13;11:e78346. doi: 10.7554/eLife.78346 (PMC9747157; doi:10.7554/eLife.78346)
Supplement: Figure 3—source data 2. [file elife-78346-fig3-data2.xlsx]

## Sheet: Data
Data used to generate polar plots in Figure 3E.
Spinal PD: < 150 μA				Spinal PD: 150-750 μA				Spinal PD: 750-1350 μA				Spinal PD: ³ 1350 μA
	Facilitation	Suppression			Facilitation	Suppression			Facilitation	Suppression			Facilitation	Suppression
Monkey H	304.95	57.582		Monkey H	315.516	135		Monkey H	87.4014	23.084		Monkey H	122.82	103.021
	21.2275	77.1655			7.84449	27.3737			319.555	0			102.299
	258.172	21.7277			53.3654	359.81			338.208	26.0443			91.339
	251.991	353.168			335.516	315			308.281	28.8252			64.0432
	221.46	49.7494			315.804	299.027			104.892	45			356.373
	311.474	93.1665			311.262	26.9033			280.893	45			14.5528
	236.607	314.813			344.691	269.947			162.268	45			18.1947
	311.197	45			317.981	331.944			45.9019	45			220.623
	276.478	264.303			131.315	315.392			341.759	46.411			231.139
	310.648	92.0003			298.371	290.771			297.579	58.2238			296.439
	241.442	127.33			279.213	352.068			284.458	21.4743		Monkey W	345.569
	308.857	103.088			290.168	300.709			284.24	36.3283			81.5234
	304.057	106.707			22.345	288.033			106.826	345.118			339.613
	285.97	297.959			288.273	135			254.973	45			114.769
	103.14	316.181			308.307	0			256.792	315			190.45
	157.66	141.208			304.644	3.40303			237.986	135			61.9802
	346.006	136.676			294.702	135			234.285	135.009			232.152
	322.769	149.215			120.062	0			326.325	121.131			243.112
	9.7624	164.045			295.337	301.61			325.926	101.14			297.043
	312.324	172.258			285.844	0			318.717	179.893			29.0164
	344.005	142.077			136.805	135			289.949	187.176			82.678
	357.334	148.031			290.632	171.015			285.441	129.203
	267.506	148.011			284.579	198.971			274.934	135
	228.315	150.653			289.813	228.826			275.31	67.3404
	313.161	134.266			277.255	144.195			323.121	89.2704
	312.041	207.61			292.064	165.218			115.357	46.8625
	305.765	183.901			268.047	170.327			231.269	55.5224
	159.524	177.566			278.901	179.185			231.812	101.843
	350.566	131.064			182.662	225.023			246.082	49.887
	272.026	130.035			262.84	124.399			286.694	78.1519
	155.707	144.468			273.424	175.121			295.709	32.1836
	341.87	131.456			139.555	184.292			294.829	131.533
	148.766	146.363			104.751	90			12.242	52.1802
	239.721	302.822			352.52	196.414			4.74772	86.9754
	231.956	45			143.606	183.827			30.9803	111.673
	346.382	125.832			110.942	355.956			240.711	122.396
	15.3751	45			250.557	161.534			257.874	109.384
	315.988	105.345			4.67606	139.441			70.1209	100.24
	310.027	135			143.3	137.398			217.522	115.455
	343.716	128.028			313.955	129.033			225.99	101.534
	355.925	94.3058			340.746	181.477			2.87303	135
	358.785	0			332.335	151.896			8.17899	315
	324.644	105.106			190.838	180.374			352.549
	259.413	100.509			174.332	344.166			346.749
		103.673			255.787	315.814			299.132
		136.143			300.394	297.988			240.789
		315			0.382413	147.426			323.653
Monkey W	91.0215	0.430279			228.039	299.675			252.573
	223.226	358.572			247.475	6.27376			342.009
	349.624	0			216.358	135			288.186
	1.53603	61.2691			143.148	3.8395			293.359
	40.9491	46.6484			184.224	47.7267			220.581
	290.846	12.3842			205.177	146.169			270.007
	200.799	16.0191			200.167	10.5917			142.987
	120.865	44.1424			201.972	50.0714			181.711
	135	354.527			176.396	6.03464			181.139
	206.98	3.04015			183.451	114.65			173.193
	305.624	0			179.166	101.556			192.842
	258.98	15.802			217.275	130.256			126.289
	107.911	7.12145			202.887	94.9431			180.695
	180	348.357			213.001	84.7985			162.346
	294.568	332.868			184.24	107.557			210.375
	233.74	341.844			201.233	99.3886			162.596
	130.571	40.0595			210.541	92.7415			163.181
	180	0.502369			216.076	304.345			181.591
	64.4077	298.003			128.605				180.45
	127.297	315.111			132.662				182.555
	309.632	285.886			182.536				193.547
	251.857	303.847			165.499				198.164
	3.83591	282.392			224.189				180.014
	4.54914	287.783			228.393				172.566
	95.8365	57.9912			2.04354				113.153
	292.948	112.862			134.976				210.505
	228.626	64.0231			251.84				169.392
	17.4774	123.297			192.281				181.872
	215.339	71.638			134.641				168.054
	57.851	85.1412			130.404				202.678
	271.228	63.0271			45				208.565
	274.479	87.4388			343.197				149.432
	250.32	91.2456			324.563				199.913
	233.372	26.5374			135.26				203.592
	241.51	48.3448			135.569				181.415
	9.89458	45.5824			270.935				198.134
	235.632	112.705			210.246				74.6369
	217.582	79.9524			289.561				188.162
	198.858	240.567			73.2248				130.435
	209.893	230.804			346.785				203.182
	3.94029	226.63			57.6748				207.466
	9.70978	251.286			54.8298				192.067
	201.556	274.679			2.53335				172.021
	258.498	250.816			306.143				214.244
	245.602	231.246			50.987				53.0692
	15.8155	225.321			41.4542				223.76
	211.685	247.915			12.7088				178.539
	358.656	46.9931			68.9052				217.849
	329.355	244.769			54.7564				263.894
	236.493	256.737			62.9516				239.704
	330.624	243.97			282.069				171.573
	200.639	183.322			287.875				207.767
	155.527	225.762			120.755				127.844
	160.041	227.391			313.867				157.106
	190.582	232.784			286.698				102.343
	45.6733	226.594			291.496				147.585
	350.196	207.516			128.554				143.126
	264.835	209.365			91.0303				143.86
	190.518	212.348			142.112				125.018
	271.904	198.264			139.078				194.155
	288.169	194.544			308.476				134.894
	284.494	199.851			284.438				147.164
	280.439	180			307.468				153.493
	37.254	59.8018			264.376				95.4003
	14.7895	280.322			93.7601				302.494
	203.813	233.387			226.785				295.778
	358.293	226.228			93.8903				301.95
	6.22506	244.771		Monkey W	16.1262	35.0363			325.505
	266.057	212.308			27.0025	25.2153			105.028
	45.6697	225			31.6423	50.8396			297.92
	10.9272	226.846			350.123	45			92.2957
	204.934	272.461			260.58	47.7205			346.92
	121.002	162.674			348.769	4.77484			14.6615
	36.722	173.649			8.84401	11.1061			269.673
	9.23778	169.753			223.861	80.7983			3.22013e-16
	87.3934	175.362			354.928	45			232.342
	341.68	176.11			331.881	45			82.804
	25.3412	166.046			295.962	86.5042			85.6362
	264.414	149.131			290.785	93.1852			37.7583
	85.1964	162.618			326.943	77.8903			82.5027
	119.755	148.297			283.249	57.1099			25.2852
	87.349	135			279	45			39.382
	279.979	146.451			312.56	34.0303			267.371
	190.456	191.198			353.527	112.147			229.484
	3.41119	140.622			250.238	85.3938			246.721
	200.38	288.927			231.249	93.9166			237.78
	252.107	27.7363			271.85	83.0663			81.8135
		46.1264			285.595	91.5976			81.7527
		48.2854			279.541	126.009			79.5805
		45			306.522	103.039			106.992
		28.7344			294.827	141.687			282.594
		22.3506			106.19	107.005			275.577
		45.6103			106.796	52.2004			295.546
		135			85.1017	38.7485			307.638
		45.5091			65.5225	42.0129			286.85
		355.984			313.731	229.432			289.221
		36.3464			231.672	52.5173			85.0131
		120.552			225.03	28.0157			113.889
		117.721			104.77	51.8685			264.948
		21.0076			93.8889	220.514			114.505
		180			101.581	61.0548			284.393
		85.7401			67.0365	0			288.308
		339.685			330.856	201.066			293.752
		5.90478			358.841	12.6521			185.01
		341.95			253.124	40.7983			101.803
		339.863			17.0848	215.406			279.458
		45			19.0549	154.821		Monkey W	11.4168	121.319
					299.372	140.528			20.8699
					278.821	134.974			2.06178
					290.798	164.398			186.67
					280.326	45			187.485
					259.834	322.839			289.188
					265.722	9.91555			169.816
					237.496	2.12116			270.422
					249.104	11.189			305.738
					229.89	21.7479			100.203
					222.649	32.8955			107.625
					227.186	17.0221			187.195
					230.015	45			225.227
					264.737	18.4142			197.927
					236.02	1.77705			212.295
					251.674	358.815			225.806
					5.12949	21.9474			212.796
					238.699	45			214.455
					250.247	124.101			222.208
					233.019	135			201.204
					233.396	105.8			242.207
					205.441	100.919			236.175
					230.033	105.485			226.844
					232.85	112.531			177.551
					215.011	111.258			198.741
					192.882	122.451			195.599
					222.571	124.883			234.002
					229.938	106.328			201.952
					225.395	307.446			187.872
					231.1	301.237			222.424
					233.826	279.607			292.496
					207.673				334.889
					210.877				248.274
					208.448				257.328
					213.31				296.994
					259.897				275.451
					216.594				291.464
					220.65				222.48
					90				288.097
					230.058				293.77
					264.016				238.576
					249.647
					260.856
					219.678
					248.066
					259.59
					213.527
					196.328
					222.796
					250.406
					176.833
					177.269
					188.126
					164.01
					184.622
					295.437
					180.119
					285.319
					190.244
					194.227
					168.811
					186.268
					274.474
					36.4406
					59.1366
					206.359
					148.211
					318.065
					188.245
					287.853
					243.663
					201.301
					307.704
					300.18
					219.569
					242.105
					279.329
					8.9387
					265.25
					268.579
					351.315
					332.134
					227.226
					249.061
					223.791
					247.318
					265.365
					44.693
					299.219
					229.075
					277.651
					294.855
					297.905
					319.855
					310.308
					305.951
					296.294
					290.433
					183.803
					95.8508
					267.199
					278.078
					266.685
					282.196

## Sheet: Statistics
Detailed statistics in Figure 3E.
Current	Type of Spinal PD	Rayleigh test			V-test
		N	P value		N	P value
< 150 μA	Facilitation	131	2.21 × 10-5		131	2.22 × 10-6
	Suppression	154	0.0323		154	0.005
150-750 μA	Facilitation	257	1.77 × 10-15		257	2.22 × 10-16
	Suppression	135	1.62 × 10-7		135	2.53 × 10-8
750-1350 μA	Facilitation	194	3.07 × 10-9		194	3.3 × 10-10
	Suppression	43	2.51 × 10-9		43	1.81 × 10-9
³ 1350 μA	Facilitation	21	0.4351
Since the number of Spinal PD of Suppression at  1350 μA is 1, no statistical test was performed using this data.
