# Supplementary material for: Tuning of motor outputs produced by spinal stimulation during voluntary control of torque directions in monkeys
Source: eLife. 2022 Dec 13;11:e78346. doi: 10.7554/eLife.78346 (PMC9747157; doi:10.7554/eLife.78346)
Supplement: Figure 3—source data 3. [file elife-78346-fig3-data3.xlsx]

## Sheet: Data
Data used to generate polar plots in Figure 3F.
Normalized Spinal PD: < 150 μA				Normalized Spinal PD: 150-750 μA				Normalized Spinal PD: 750-1350 μA				Normalized Spinal PD: ³ 1350 μA
	Facilitation	Suppression			Facilitation	Suppression			Facilitation	Suppression			Facilitation	Suppression
Monkey H	250.711	78.8877		Monkey H	351.026	138.984		Monkey H	323.383	349.676		Monkey H	155.783	351.889
	335.768	119.472			339.499	332.535			346.09	54.0248			158.172
	265.745	97.1205			318.858	56.0081			340.219	74.3596			237.159
	337.502	320.226			333.838	302.244			327.852	96.5036			218.706
	315.114	333.679			312.105	355.455			311.556	101.618			236.32
	302.286	350.13			331.537	337.883			139.88	105.529			193.857
	326.521	265.185			55.8532	346.541			282.039	106.28			185.654
	22.7742	261.598			323.283	355.182			281.802	344.26			163.825
	359.427	331.904			340.533	347.374			267.346	309.513			178.067
	355.381	342.117			337.037	288.291			262.8	342.586			185.307
	338.62	355.437			321.967	301.443			348.782	354.984		Monkey W	99.4009
	359.405	352.815			149.167	17.6026			352.171	199.498			192.777
	305.329	353.96			321.98	325.804			340.732	327.928			346.536
	220.674	356.978			315.28	50.6731			358.456	347.903			325.781
	345.346	336.911			159.295	244.372			351.83	337.855			281.335
	288.165	294.204			352.592	354.45			340.3	323.483			118.291
	6.89482	359.496			350.603	358.269			338.594	325.946			317.587
	242.455	342.198			359.893	334.248			175.892	355.389			22.9131
	237.861	330.432			337.385	352.942			287.887	350.434			65.6032
	8.30195	293.036			357.17	355.968			292.342	342.928			170.821
	0.97713	359.451			332.622	355.514			305.952	353.696			235.881
	15.4109	349.767			339.745	292.122			339.031	341.228
	237.966	356.736			241.454	352.484			347.257	344.555
	43.7027	343.682			316.209	254.351			341.112	356.69
	63.0259	87.5764			339.484	358.545			275.942	357.464
	35.8485	335.278			198.896	354.949			299.871	352.088
	21.0921	352.89			312.769	354.353			337.017	356.484
	47.4415	345.713			327.401	346.919			291.542	14.4264
	29.2294	356.186			347.754	354.467			305.87	22.501
	70.5835	41.865			352.142	356.956			349.753	117.997
	134.73	63.0346			195.583	348.724			261.729	38.464
	123.837	12.4959			187.24	335.342			329.806	9.9136
	201.303	22.4185			306.46	359.243			331.871	1.08455
	120.993	15.4569			287.634	334.861			335.534	41.3631
	133.756	43.9968			356.847	311.037			222.603	52.8398
	32.5869	40.7832			341.721	328.053			333.252	25.9395
	33.9279	21.0853			259.965	337.709			262.671	72.8093
	215.798	28.085			280.834	320.002			291.949	38.007
	298.753	4.1736			325.61	354.396			298.459	9.37685
	338.562	120.678			343.953	343.497			303.902	3.61438
	341.295	24.2147			327.884	334.427			329.263	7.5308
	349.752	85.2583			326.055	354.212			277.397	31.8227
	302.599	120.369			322.185	352.511			335.193
	151.925	118.994			329.854	348.873			313.555
		72.2602			358.024	355.727			295.427
		34.9678			350.147	20.9371			309.114
		40.8506			357.854	0.279079			319.687
Monkey W	342.965	344.436			311.322	310.537			329.297
	224.479	359.056			316.032	50.8597			337.526
	144.258	358.114			351.175	60.5727			333.136
	165.771	19.3107			187.735	131.039			270.377
	243.703	23.6794			314.947	25.2821			356.988
	343.866	31.3478			352.988	35.5192			330.927
	302.882	20.5034			354.475	4.05696			340.605
	157.181	356.261			347.737	41.4829			322.424
	240.204	58.0395			262.574	215.79			349.666
	342.592	37.2249			351.87	19.1083			334.396
	341.201	349.04			350.939	31.136			258.316
	53.6319	336.666			351.265	17.6241			319.802
	49.8794	353.116			324.006	21.8533			354.862
	112.615	342.597			353.11	86.8526			238.169
	303.825	340.965			357.964	93.9691			352.618
	351.034	331.566			344.219	1.7023			351
	140.355	356.953			344.802	7.74925			296.294
	333.126	344.028			193.923	30.4166			337.449
	189.578	270.045			261.022				313.748
	358.301	247.583			145.272				342.697
	340.767	349.508			304.095				344.209
	350.503	353.949			33.1669				163.612
	142.452	154.974			308.602				300.753
	354.124	307.054			302.011				348.397
	164.094	358.319			339.785				303.38
	174.211	357.579			126.852				355.38
	146.632	353.807			29.4854				350.704
	349	359.373			256.887				350.928
	354.922	351.95			71.8973				334.384
	356.584	345.725			52.097				261.832
	200.863	169.527			162.925				169.614
	295.614	344.268			82.9395				71.415
	280.559	350.77			234.669				297.323
	357.761	356.131			0.364756				95.983
	141.829	353.487			24.8059				271.413
	321.73	317.808			14.3775				151.945
	317.403	309.278			7.60916				39.835
	359.249	240.096			5.69069				338.353
	323.872	155.106			9.27041				14.6243
	342.129	216.675			31.9114				167.422
	322.667	221.93			38.9416				183.91
	343.312	343.464			56.1912				3.64289
	327.295	357.939			198.705				162.762
	352.036	348.904			181.519				154.029
	218.379	332.929			113.505				295.436
	32.5421	356.064			65.6954				346.15
	249.914	353.878			19.5285				239.314
	288.806	271.749			4.52642				14.969
	75.0276	343.581			322.177				13.3723
	222.282	35.7864			17.5493				1.1663
	323.032	76.7099			265.785				4.03151
	15.3785	345.075			23.3361				7.404
	258.556	39.8236			4.45838				9.80508
	196.533	27.5659			20.1255				23.6699
	90.8365	0.0611247			175.169				30.8784
	113.926	16.8651			180.716				6.57109
	56.3926	9.47177			2.72836				27.133
	245.522	4.55736			214.027				11.1256
	218.573	12.6148			175.251				40.5217
	28.8969	6.82069			178.151				40.3938
	34.5203	20.7845			14.7457				17.0348
	2.78336	71.788			38.2429				38.3903
	15.3704	38.8241			36.2538				33.8757
	16.7964	12.4443			83.7617				40.7292
	1.13272	9.61186			129.158				75.9222
	8.22346	16.175			10.4881				56.4019
	5.34264	8.03935			223.4				24.125
	142.284	4.86175		Monkey W	339.089	33.1713			2.57809
	111.055	3.87023			243.3	41.5482			1.10404
	15.6826	83.767			358.344	113.341			1.21465
	158.72	33.0315			320.205	69.2422			56.4982
	43.2733	16.1019			304.433	58.6474			0.0750779
	29.7382	46.2202			348.949	108.986			3.1431
	159.882	18.6681			334.751	145.279			15.0056
	65.8165	2.97248			331.548	133.29			157.128
	11.0651	11.9122			302.332	114.346			168.136
	42.0021	6.25421			286.649	87.5672			200.419
	167.857	20.4846			329.086	76.1562			38.2325
	310.612	7.34455			338.694	124.864			23.012
	225.787	2.58224			322.108	176.44			314.8
	155.512	9.51823			354.804	164.595			203.417
	95.1454	8.61587			341.399	167.798			159.747
	45.1585	2.7658			357.023	352.681			47.4329
	300.41	1.45851			341.828	184.393			47.0775
	221.946	43.8182			43.096	158.474			25.9536
	5.86808	4.20323			317.231	184.529			10.1482
	165.518	3.54249			294.724	355.031			211.181
		18.3358			355.752	231.63			177.271
		8.62723			298.468	168.969			195.766
		8.5459			354.129	162.612			170.156
		58.4402			348.495	189.748			38.7805
		2.20323			352.971	354.837			39.8338
		14.4943			346.245	349.514			34.4893
		14.5817			358.32	349.553			171.156
		4.22949			128.378	60.9408			159.913
		33.5019			347.083	326.603			180.563
		1.88848			343.135	318.562			195.718
		4.73085			337.318	327.584			178.698
		80.4069			338.298	338.422			177.381
		6.32834			307.415	352.805			10.1088
		313.749			351.615	330.67			154.765
		1.53468			355.927	333.817			2.00932
		3.62647			253.42	319.962			6.78188
		80.5465			353.235	341.272			4.33251
		7.60714			350.054	359.392			166.283
		1.84221			348.68	353.59			161.252
		8.92349			256.012	348.873		Monkey W	347.162	8.88177
					138.324	326.318			357.464
					139.592	19.3912			341.197
					314.209	7.36216			188.956
					247.055	30.1478			194.058
					204.186	18.0407			316.918
					320.194	18.7337			205.726
					354.825	39.0741			306.144
					336.53	16.8925			334.213
					335.199	21.427			308.08
					316.921	3.53401			358.017
					335.78	29.8547			324.578
					229.947	57.5726			326.573
					143.486	70.8419			353.756
					301.105	106.431			347.684
					315.789	4.4865			202.728
					301.445	3.715			356.842
					309.315	3.56988			316.146
					0.406746	122.818			327.374
					16.6703	8.03737			273.572
					3.87134	315.237			46.2623
					339.472	4.5221			28.9729
					236.972	5.4272			19.1074
					322.099	100.853			19.2957
					25.7588	5.43496			7.5185
					0.444725	5.41801			13.0262
					45.8921	10.6263			8.4942
					42.3331	10.2911			13.4226
					41.577	13.2358			21.9154
					7.28406	6.1505			42.533
					240.658	1.23827			39.1056
					163.171				197.353
					152.54				175.843
					26.9943				239.317
					18.7697				286.299
					36.124				208.057
					4.97103				211.403
					301.336				256.084
					290.405				177.001
					221.877				179.028
					27.2746				110.76
					13.0559
					12.7408
					21.3067
					2.54481
					12.1765
					6.03133
					6.66152
					0.490997
					5.51107
					21.1102
					9.08552
					32.5932
					16.6893
					21.4521
					17.4166
					21.178
					74.2401
					17.1798
					17.5599
					5.06773
					28.8906
					44.148
					9.63722
					37.0156
					54.0398
					4.78055
					1.82945
					24.1241
					13.9641
					2.85568
					28.7575
					5.93097
					26.8482
					144.331
					30.4644
					139.899
					32.6744
					33.0725
					1.83779
					296.648
					87.8327
					187.558
					156.009
					252.892
					267.126
					176.243
					195.753
					231.423
					228.288
					236.66
					303.435
					297.833
					182.629
					209.777
					183.116
					209.259
					224.887
					180.545
					194.929
					175.746
					193.888
					188.69
					201.122

## Sheet: Statistics
Detailed statistics in Figure 3F.
Current	Type of Normalized Spinal PD	Rayleigh test			V-test
		N	P value		N	P value
< 150 μA	Facilitation	131	2.43 × 10-5		131	3.05 × 10-6
	Suppression	154	6.78 × 10-44		154	0
150-750 μA	Facilitation	257	1.88 × 10-26		257	0
	Suppression	135	1.84 × 10-22		135	0
750-1350 μA	Facilitation	194	1.13 × 10-16		194	6.44 × 10-15
	Suppression	43	6.66 × 10-12		43	4.02 × 10-11
³ 1350 μA	Facilitation	21	0.0479		21	0.0304
Since the number of Normalized Spinal PD of Suppression at ³ 1350 μA is 1, no statistical test was performed using this data.
