# Supplementary material for: Tuning of motor outputs produced by spinal stimulation during voluntary control of torque directions in monkeys
Source: eLife. 2022 Dec 13;11:e78346. doi: 10.7554/eLife.78346 (PMC9747157; doi:10.7554/eLife.78346)
Supplement: Figure 4—source data 1. [file elife-78346-fig4-data1.xlsx]

## Sheet: Data
Data used to generate bar plots in Figure 4E.
Spinal Facilitation				Spinal Suppression
Rostral site	Caudal site			Rostral site	Caudal site
0.00307673	0.0719446			0.53019	1.14865
0.0158633	0.00686866			0.00791708	0.0762817
0.0186201	1.19455			0.221661	0.0013125
14.7001	3.84635			0.00762017	0.447545
0.0398939	5.68586			0.642131	0.226817
0.0161075	22.8671			0.000304843	0.29219
0.0404685	12.4399			0.433543	0.118316
1.68033	0.62818			0.0306334	0.918674
0.0225074	0.0631709			0.513769	0.00162171
1.26159	4.41783			0.0015224	0.401001
12.9379	0.768163			0.0082648	0.641004
0.00258727	0.0791283			0.193681	0.204119
3.49784	0.0380523			0.532012	0.00140884
7.63924	0.00140259			0.106434	0.446705
0.995961	0.00510585			0.00467084	0.559476
0.159364	2.97182			0.0741025	0.641146
14.4476	0.0483142			0.0136293	0.237001
4.56591	6.63763			0.124062	0.228118
0.0101476	0.28459			0.192019	0.532419
1.26234	1.32213			1.98275	0.0735727
0.0540587	16.461			0.0421681	0.00826122
2.93151	0.00164392			0.0970277	0.00141029
0.0315714	0.0496009			0.266237	0.00599857
0.0466609	0.00876826			0.00203717	0.00371157
0.014448	0.0782029			0.0579305	0.0505347
0.0203358	0.0329712			0.000126843	0.000557388
0.00641482	0.485243			0.00107859	0.00128149
11.2119	0.0667417			0.104451	0.00195615
0.0371377	0.165706			0.0444925	0.0443564
0.134554	0.113055			0.00456107	0.0161777
0.0125337	0.773782			0.00100626	0.000475983
0.00581406	0.00499528			0.00332841	0.187451
0.00550187	0.0145743			0.75395	0.00648547
4.25371	0.0198366			0.00956261	0.00425857
27.6043	0.212101			0.322723	0.21146
0.0327649	0.0555527			0.000816148	0.159372
3.5243	0.0430336			0.000239603	0.101148
7.41082	0.083738			0.00750961	0.421172
1.00092	0.0313472			0.108834	0.000528877
1.04103	0.262999			0.00749347	0.877347
26.8797	1.87253			0.0374676	0.015773
10.5525	3.70237			0.000550529	0.259118
0.0399901	11.9691			0.00397837	0.0459382
3.65947	6.50493			0.000699107	0.00748604
0.023059	1.69287			0.00624884	0.899171
2.96289	0.226589			0.00390284	0.00369626
0.0159899	2.50891			0.228604	0.403652
0.00964607	0.761351			0.916383	0.179602
0.1339	0.123643			0.0176656	0.40337
0.000445978	0.0446823			0.000451334	0.268238
0.13273	0.00865068			0.0266639	0.0982396
9.33971	0.024119			0.00983745	0.000223746
0.18524	1.12521			0.00699039	0.733257
0.00305874	0.553352			0.00222032	0.123083
0.00933094	2.14262				0.755544
0.0799633	0.418019				0.394116
0.00766964	0.663864				0.0382983
2.46194	7.87472				0.00918876
25.9826	0.0122588				0.00332048
0.00539821	0.0474873				0.089475
1.28034	0.6527				0.0196128
3.34318	0.394942				0.198
0.357478	0.0485001				0.040172
0.373508	0.0787748				0.121632
26.2639	0.52071				0.0976546
6.75943	0.0166708				0.00395235
0.00660138	0.0789673				0.179637
1.02994	0.132228				0.00271962
0.0258195	0.196667				0.402518
2.17689	0.0300849				0.000473883
0.0461883	0.12084				0.0980498
0.00294589	0.0126191				0.0541647
0.0998806	0.18225				0.000566553
0.00277359	0.126993				0.066452
0.158798	0.714905				0.082812
10.1944	1.84315				0.703032
0.313208	6.05346				0.694458
0.00705438	2.1958				0.190344
0.00634338	0.487522				0.00203231
0.161557	0.0691802				0.112313
0.0499737	1.3792				1.00907
3.46605	0.00783947				0.653415
37.263	0.0164228				0.000472786
0.066177	0.0046915				0.00388506
1.29982	0.0800336				0.0067027
3.15621	0.201919				0.0226745
0.33782	0.243168				0.0310949
0.400542	0.0412374				0.298029
38.3386	0.314702				0.0336256
9.68376	0.074432				0.00858434
0.0120956	0.184357				0.355303
1.0057	4.09188				0.00223047
0.0471354	0.0298831				0.58582
2.81781	0.0492165				0.0124273
0.0541168	0.0234713				0.703335
0.00249188	9.40449e-05				0.00195234
0.0130335	0.00955176				0.252308
0.0574159	0.227061				0.283617
0.0107744	0.0162592				0.00349856
3.54979	0.126393				0.487637
0.00929073	0.000475323				0.336864
0.00627993	1.34547				0.10738
0.0223362	0.0133175				0.82716
0.0751101	0.0033104				0.00756797
0.0284129	0.0626276				0.020051
0.891863	0.00373299				0.589878
14.9099	0.0013041				0.461438
0.00485212	0.000152375				0.185256
0.650786	0.0975398				0.00110895
1.46637	0.174384				0.000425224
0.052096	0.778309				0.272227
0.130005	2.3848				0.101371
22.8205	5.15938				0.245644
2.92228	22.7594				0.010831
0.00291555	14.268				0.267037
0.406418	0.46505				0.00662646
0.0156825	0.0821475				0.00778159
1.2159	1.93732				0.000672883
0.164784	0.0782565				0.249671
	0.0458419				0.0333421
	0.0254088				0.548764
	0.0678222				0.0260156
	0.296436				0.242404
	2.48736				0.101222
	0.206253				0.740311
	3.50968				0.00513984
	0.191159				0.784189
	1.8673				0.00263999
	8.54193				0.89443
	0.0566225				0.362781
	0.0641155
	0.0411935
	0.000649379
	0.0154562
	0.293167
	0.0149213
	0.138427
	0.0158651
	1.51664
	0.0157522
	0.00458855
	0.00484425
	0.00354506
	0.00879108
	0.00214616
	0.000614801
	0.0265039
	0.0160992
	1.50457
	1.09811
	7.54541
	4.47489
	0.0846187
	0.0114068
	0.689018
	8.979e-05
	0.0257125
	0.000730391
	0.893835
	0.138088
	0.847255
	0.132356
	0.329574
	4.72773
	0.0134533
	0.0601608
	0.00594428
	0.00211953
	0.0437222
	0.304793
	0.00734762
	0.133934
	0.00982113
	0.307766
	0.00226277
	0.00611637
	0.00224834
	0.00701868
	0.00593303
	0.000118595

## Sheet: Statistics
Detailed statistics in Figure 4E.
Type of PStEs	T value	df	P value
Facilitation	3.2745	297	0.0012
Suppression	-1.3464	182	0.1799
Two-sided unpaired t-tests were conducted.
