# Supplementary material for: Tuning of motor outputs produced by spinal stimulation during voluntary control of torque directions in monkeys
Source: eLife. 2022 Dec 13;11:e78346. doi: 10.7554/eLife.78346 (PMC9747157; doi:10.7554/eLife.78346)
Supplement: Figure 4—source data 2. [file elife-78346-fig4-data2.xlsx]

## Sheet: Data
Data used to generate bar plots in Figure 4F.
Spinal Facilitation				Spinal Suppression
Rostral site	Caudal site			Rostral site	Caudal site
0.00962319	0.784824			1.08718	1.50691
0.161667	0.207597			0.0164132	0.0413204
0.275105	1.19129			0.761937	0.929727
20.052	7.29798			0.00418708	1.38774
0.0288749	13.1193			9.03628e-05	1.40667
0.00202071	42.4247			0.00468617	0.815211
0.096414	38.7139			0.143515	1.08713
1.06223	0.147681			0.00120506	0.418087
0.015698	0.0021214			0.000155808	0.0546387
1.00894	5.04569			0.007727	0.00117064
9.50922	0.0810967			0.00416066	1.13409
1.23526	0.0285776			0.185596	0.0926068
2.80489	0.00917573			1.05719	0.0725827
0.437115	0.025508			0.0178286	0.155098
0.234644	0.16062			0.514909	0.00443331
8.12893	3.99096			0.0299065	0.190573
2.57334	0.252628			0.160625	0.00609466
0.00357349	9.80047			0.0224383	0.00292102
0.479677	0.686191			0.0565904	0.0795438
0.0131854	5.92286			0.0042909	0.122344
1.2922	28.8594			0.000103279	0.319772
0.0401427	0.0047449			0.0197824	0.0824448
0.00237893	0.129545			0.601317	0.835422
0.00464327	0.0146911			1.47437	2.28714
0.00203663	0.051579			0.0946913	0.94994
8.83524	0.110885			1.0635	0.38993
0.00654275	1.09546			0.023563	0.514958
0.000777057	0.0168243			0.101171	0.198715
0.398001	0.596744			0.0439484	0.0489139
2.06426	0.00818732			0.0107911	0.00876022
0.0809267	5.23395			0.0070679	0.267905
1.01207	0.0202257			0.00603479	0.00892994
5.93091	0.108248			0.0244171	0.0896806
0.00362973	0.0147363			0.559694	0.0288352
2.87609	0.27446			0.856207	0.0274929
7.08245	0.0024113			0.087419	0.00672998
0.901306	0.00703478			0.31593	0.0750555
0.276748	0.0297996			0.00724597	0.0140977
8.76546	0.0488423			0.0777538	0.000886323
4.11465	0.599358			0.0115999	0.0176016
0.00925952	3.49909			0.0939628	0.0121764
1.00887	5.49503			0.0387413	0.00235914
0.00145983	28.7133			0.00147022	0.122052
2.37325	21.4347			0.14187	0.0112958
0.0656984	0.00770815			1.33676	2.03488
0.00129983	0.0076019			0.0148269	1.5659
0.0107978	2.11616			0.653949	0.053741
0.0222391	0.0168819			0.0700617	0.165944
17.4632	0.0574005			0.00132735	0.12738
0.0112417	0.0163513			0.000197207	0.0643187
0.00109861	0.0134353			0.00167375	0.00136805
0.550596	3.83586			0.00137465	0.313111
2.49888	0.364114			0.161185	0.0628676
0.120434	5.06755			0.0051673	0.00488332
1.4077	0.382796			0.140511	0.000514233
5.60336	3.02697			0.00215502	0.012995
3.86683	18.196			0.0785424	0.00885714
8.93303	0.0025662			0.0010275	0.0141855
0.911635	0.299593			0.0197461	0.064421
0.495871	0.0263024			0.00579634	0.00027151
8.80802	0.379129			0.000117274	0.0126019
4.14244	0.6322			0.733153	0.00458441
0.000679183	5.41558			0.0304446	0.00547552
1.05392	0.0685607			0.550885	1.49571
0.00705529	2.28892			0.0260429	0.0530473
2.12594	0.0268911			0.0865307	1.07945
0.0323478	9.96702			0.00300276	0.94123
0.00794409	0.0182299			0.0663089	1.46922
0.00488356	0.187436			0.0541379	1.57855
0.011004	0.0369417			0.00139107	1.22383
14.2628	0.103059			0.00113382	0.0533333
0.0848895	0.00157525			0.00049747	0.0220822
0.0130562	0.0516648			0.0162607	0.142194
0.0137938	0.537759			1.96557	0.0439575
0.475924	0.0908908			0.089709	0.622648
0.0155929	2.90864			1.19939	0.00586369
0.630023	7.78051			0.105628	0.000995569
4.0633	9.40637			0.0890819	0.0577661
0.00276094	52.6743			0.00217815	0.00307514
0.962854	39.2551			0.533082	0.0107594
2.30593	0.0173887			0.154242	0.00194752
0.314584	0.000261703			0.000218998	0.174049
0.142753	2.29979			0.000121963	0.00345294
5.39625	0.351093			0.0567249	0.119273
2.75446	0.267584			0.0166409	0.00267338
0.00139543	0.0934803			0.646034	0.75335
0.610565	0.0041939			0.00661639	0.553905
0.0744263	0.00599059			0.997073	0.215809
1.60936	6.36328			0.0588398	0.711002
0.00652705	0.931698			1.06458	0.102248
0.102997	12.1109			0.00259272	0.00203354
0.00355343	1.35354			0.562748	0.552168
0.223251	5.49535			0.00179738	0.123468
82.727	31.5831			0.355054	0.0005042
0.399599	0.00955785			0.00192815	0.0207349
0.389473	0.369836			0.00743462	0.00343424
0.206445	0.0280283			0.271315	0.0284186
16.5437	0.639699			0.316007	0.0033316
0.0626349	0.726325			0.475117	0.00462884
0.811087	5.39379			0.0103756	1.73581
1.85312	0.0745405			0.240093	0.650864
0.0059665	2.09073			0.0113358	0.299641
5.65297	0.249415			0.158256	0.143877
1.52299	4.82156			0.00917542	0.0894629
1.73753	0.0208082			0.0838557	0.00716233
21.3973	0.358284			0.0175548	0.108011
3.1614	0.0264544			0.00052473	0.0187944
0.0101659	0.295067			0.09263	0.206596
2.2936	0.00366239			1.13949	0.0015407
0.606946	0.100659			0.00577291	0.00550089
11.4492	0.0395238			0.849951	0.00782428
0.186093	0.192163			0.00186943	0.00126684
0.0410194	0.726355			0.0357003	0.0545267
0.0371151	4.99285			0.0028019	0.101799
0.023183	7.31372			0.000845262	2.76338
0.038501	28.468			0.0107242	1.94684
38.8705	18.328			0.0302169	0.0455291
0.000180218	0.0890207				0.0883294
0.000320973	0.00310808				0.0778916
0.0266536	2.9986				0.445243
0.0973713	0.114377				0.0115851
0.011439	0.0302184				0.824348
0.138232	0.00955177				0.00277759
1.87746	0.00948974				0.00209217
0.0027466	0.048083				0.0160583
0.494218	2.5211				0.000563842
0.630229	0.551794				0.00257543
0.000783704	5.70274				0.000641285
0.0662934	0.654522				0.000915103
7.66518	2.44461				0.00860088
0.679583	17.6209				0.00604813
0.0069018	0.113921				2.48172
0.135437	0.0195745				1.84857
0.140701	0.00173545				0.00119539
0.086095	0.0862332				0.0100009
0.00406128	0.558368				0.00658249
0.0511556	0.0621528				0.770649
0.00478114	0.289263				0.0532806
15.1973	0.0125094				0.00872133
0.043508	1.41426				1.02322
0.000972619	0.0120298				0.124182
0.433207	0.0498325				0.00746257
1.24124	0.0173771				0.00080229
0.0340903	0.00752848				0.122234
0.607474	0.000791584				0.951019
4.11812	0.00219016				0.635597
0.00185083	4.13154				0.0020465
2.77512	0.0469601				0.00164918
6.4415	72.7608				0.34106
0.693751	167.458				0.0693963
0.390827	209.286				0.000874666
7.93356	217.569				0.000236075
3.26741	113.893				0.255606
0.0324245	0.013841				2.13997
1.22219	0.0182799				0.320686
0.129416	36.8523				0.467571
2.36072	3.34394				0.2467
0.0857464	0.267919				0.00404015
0.000508853	0.396397				0.00257279
0.00210094	0.0634991				0.0394001
0.00656913	0.0899798				0.397809
20.6031	86.9356				0.484509
0.0030097	0.160059				0.00134396
0.0048547	100.284				0.00604489
0.657391	13.0232				0.00191829
0.00115567	62.6058				0.0211733
0.537123	245.665				0.0222182
5.28604	1.62953				0.291118
0.000873301	1.72821				1.23017
3.37839	0.312852				0.024134
7.16839	1.04711				0.0555858
1.14028	0.0804619				0.0599733
0.542335	8.69732				0.000409112
8.65898	0.0113802				0.00289989
5.12325	0.425622				2.08023
0.00421251	0.290858				0.0318742
1.59929	6.91972				0.523395
0.0527792	0.0114594				1.08191
2.40692	0.244655				0.82246
0.0115947	0.0325488				1.84969
0.00420965	0.142198				0.956082
0.0195041	0.00984659				0.00263191
0.00261242	0.0504533				0.01151
0.000993676	0.584449				0.0114503
14.0691	0.0842797				0.000823173
0.00230599	20.9626				0.0109323
0.00358165	12.726				0.000869499
0.0109868	27.453				0.00227965
0.212357	118.338				0.00159229
0.000751179	96.1207				3.49414e-05
0.299675	0.00150566
2.96121	6.24291
0.00350191	6.17033
1.47885	1.22195
3.23727	0.525056
0.475434	0.0546003
0.143801	0.012477
5.31173	13.0394
2.28951	0.173773
0.00476549	41.7253
0.962847	1.31834
0.000154218	17.4678
1.25722	131.448
0.0125864	0.00250305
0.00579468	0.00225579
0.0543516	0.0175126
0.00255682	0.348336
0.0016073	0.228493
12.3724	0.0190602
0.0536006	0.0231797
0.0101791	0.0159591
0.143354	0.0142066
0.525321	0.667231
0.0536938	0.015368
0.30603	0.00407859
3.49014	0.007464
0.00754056	0.0148909
1.14792	0.0204347
2.94783	0.00483116
0.265904	0.437785
0.107812	0.0509156
4.90902	2.90685
1.89261	5.08788
0.0154996	7.46752
0.122805	27.8097
0.134026	21.9327
0.683602	0.0319795
0.0031034	2.43066
0.00312461	1.48424
0.00357258	1.35876
0.0049123	0.953236
0.0235381	0.014467
13.5119	0.0447919
0.110105	3.29364
0.0030227	0.357563
0.225662	6.6049
0.371829	0.483744
0.104957	2.5946
0.185103	22.1529
5.31945	0.0137539
0.00795132	0.10911
2.42783	0.145262
6.36537	0.237882
0.574739	0.346725
0.332568	4.47421
9.67624	0.103102
2.10954	1.72752
0.0996068	0.744329
0.186825	6.98174
0.0105854	0.170347
2.74727	0.69463
0.554668	0.0930506
	0.317148
	0.00658783
	0.348562
	6.16546
	0.196648
	19.7145
	5.70558
	10.7067
	110.112
	50.9058
	0.0417426
	0.000478365
	1.89012
	4.64787
	5.95469
	3.87653
	0.000864804
	0.00197977
	3.24818
	0.261536
	12.3521
	0.222385
	3.14455
	54.0803
	0.00151947
	0.0149922
	0.0110222
	0.713357
	0.138513
	7.64794
	0.0123232
	1.94986
	0.726331
	7.45433
	0.0684105
	1.93047
	0.312417
	0.747297
	0.0258501
	0.794177
	1.69728
	0.250768
	6.58457
	4.54246
	7.69849
	54.6816
	34.2653
	0.143256
	0.00858138
	2.14771
	3.21421
	0.95271
	1.3147
	0.0093795
	0.0174556
	3.43212
	0.132387
	7.96571
	0.206673
	1.85628
	21.1258
	0.0202048
	0.00157567
	0.0159132
	1.42627
	0.00278654
	1.96276
	0.000672237
	0.153101
	0.18197
	5.17627
	0.108559
	0.603767
	0.0391093
	0.196533
	0.0117207
	0.121805
	0.739807
	0.00958406
	4.29758
	3.50773
	5.18385
	40.5264
	18.6816
	0.362066
	0.012006
	2.4936
	1.24667
	0.566319
	0.319467
	0.00786222
	0.0214198
	2.65054
	0.194021
	4.43899
	0.205533
	1.18758
	11.1355
	0.0104594
	0.0102281
	0.605639
	0.0206667
	0.578659
	0.0050003
	0.0492107
	0.114721
	3.03557
	0.0777308
	0.273634
	0.0396352
	0.344577
	0.0323297
	0.258069
	0.0263805
	0.0283597
	0.209776
	13.7641
	15.6479
	44.6638
	23.8535
	0.255094
	0.0330905
	6.51037
	0.044289
	0.0123823
	0.174722
	0.0371077
	9.664
	2.41025
	13.8777
	3.44182
	6.87898
	30.1973
	0.675521
	0.0168569
	0.00729968
	0.653344
	0.276118
	1.21675
	0.0413262
	0.774425
	0.141886
	3.19984
	0.104949
	0.128664
	0.00652442
	0.15537
	0.0219038
	0.0436972

## Sheet: Statistics
Detailed statistics in Figure 4F.
Type of PStEs	T value	df	P value
Facilitation	-3.4169	651	6.73 × 10-4
Suppression	-2.001	305	0.0463
Two-sided unpaired t-tests were conducted.
