# Supplementary material for: Tuning of motor outputs produced by spinal stimulation during voluntary control of torque directions in monkeys
Source: eLife. 2022 Dec 13;11:e78346. doi: 10.7554/eLife.78346 (PMC9747157; doi:10.7554/eLife.78346)
Supplement: Figure 4—source data 3. [file elife-78346-fig4-data3.xlsx]

## Sheet: Data
Data used to generate polar plots in Figure 4G.
Rostrally-innervated muscles: Rostral site												Rostrally-innervated muscles: Caudal site
Spinal PD				Background EMG PD				Normalized Spinal PD				Spinal PD				Background EMG PD				Normalized Spinal PD
	Facilitation	Suppression			Facilitation	Suppression			Facilitation	Suppression			Facilitation	Suppression			Facilitation	Suppression			Facilitation	Suppression
Monkey H	346.382	130.035		Monkey H	130.584	130.584		Monkey H	354.475	359.451		Monkey H	15.3751	144.468		Monkey H	154.701	154.701		Monkey H	220.674	349.767
	134.641	183.827			140.166	142.344			313.748	354.467			45	131.456			142.426	134.72			262.574	356.736
	102.343	355.956			148.594	140.166			347.737	356.956			143.86	161.534			142.645	142.426			342.697	354.949
	147.585	146.363			145.007	142.189			344.209	87.5764			343.197	139.441			144.492	144.492			351.87	354.353
	143.126	181.477			142.022	150.341			350.939	359.243			324.563	137.398			143.044	143.044			345.346	347.903
	130.404	151.896			142.666	157.429			163.612	334.861			125.018	135.009			142.321	147.106			303.38	346.919
	134.894	180.374			150.685	162.75			300.753	335.278			194.155	129.033			137.657	142.113			1.21465	337.855
	147.164	344.166			147.089	322.313			348.397	337.709			135.26	121.131			143.39	143.276			198.705	323.483
	135.569	315.814			144.63	318.858			351.265	352.89			315.988	101.14			330.641	137.657			181.519	343.682
	270.935	45			157.429	317.424			324.006	354.396			295.778	302.822			138.65	319.14			56.4982	348.724
	153.493	299.675			150.35	300.432			355.38	352.511			301.95	297.988			133.814	309.264			157.128	325.946
	95.4003	6.27376			291.789	31.4123			353.11	348.873			210.246	179.893			144.55	213.946			168.136	335.342
	302.494	135			287.488	48.1474			357.964	41.4829			325.505	187.176			125.086	148.712			65.6954	355.389
	289.561	135			270.033	14.6306			350.704	215.79			343.716	147.426			5.15396	172.084			200.419	311.037
	105.028	0			164.275	24.7217			344.219	4.1736			269.673	129.203			66.2558	133.814			338.562	328.053
	297.92	10.5917			259.688	32.8828			350.928	31.136			3.22013e-16	135			56.6204	125.086			203.417	350.434
	310.027	105.106			11.2738	112.217			334.384	17.6241			232.342	125.832			72.5946	5.15396			159.747	342.928
	73.2248	136.143			68.6984	101.175			344.802	21.8533			358.785	45			9.03365	20.7853			349.752	353.696
	92.2957	114.65			69.2837	106.901			215.798	86.8526			324.644	105.345			22.0456	20.0866			302.599	320.002
	346.92	101.556			32.1206	107.16			2.57809	120.369			267.371	67.3404			56.1906	66.2558			211.181	341.228
	14.6615	130.256			26.2644	99.8394			1.10404	34.9678			229.484	3.8395			52.2124	52.8027			177.271	344.555
	346.785	99.3886			24.6078	106.877			0.0750779	7.74925			246.721	47.7267			50.9554	79.6739			195.766	345.713
	57.6748	92.7415			40.1255	103.869			113.505	30.4166			237.78	89.2704			67.6249	47.9072			170.156	356.186
	82.804				35.3711				3.1431				259.413	146.169			107.487	52.2002			151.925	343.497
	85.6362				38.5587				15.0056				286.698	46.8625			111.446	56.4281			175.251	356.69
	54.8298				63.5652				19.5285				295.546	55.5224			114.983	72.5946			180.563	334.427
	2.53335				38.5276				38.2325				291.496	101.843			113.345	49.0035			178.151	354.212
	37.7583				42.3782				298.753				307.638	128.028			111.92	9.03365			195.718	357.464
	355.925				14.6306				4.52642				286.85	94.3058			108.152	22.0456			178.698	352.088
	306.143				40.3582				23.012				289.221	50.0714			111.84	48.3691			177.381	356.484
	50.987				57.8767				314.8					49.887				56.1906				19.1083
	82.5027				56.5492				322.177					6.03464				46.0331				38.464
	41.4542				43.4904				17.5493					78.1519				52.2124				9.9136
	25.2852				34.5809				47.4329					32.1836				50.9554				120.678
	39.382				29.2338				47.0775					131.533				58.7235				24.2147
	12.7088				28.4895				341.295					52.1802				67.6249				85.2583
	68.9052				45.5692				265.785					86.9754				48.9684				1.08455
	81.8135				43.033				25.9536					100.509				114.796				41.3631
	81.7527				41.9189				10.1482					103.673				107.487				93.9691
	54.7564				50.298				23.3361					94.9431				111.446				52.8398
	62.9516				42.8261				38.7805					111.673				114.983				118.994
	79.5805				45.0911				39.8338					84.7985				110.371				72.2602
	282.069				106.901				4.45838					107.557				113.345				1.7023
	287.875				107.16				20.1255					122.396				113.019				25.9395
	120.755				118.026				34.4893					109.384				111.92				72.8093
	106.992				116.065				175.169					100.24				108.152				38.007
	282.594				111.439				180.716					115.455				111.84				9.37685
	275.577				115.664				2.72836					101.534				105.05				3.61438
	313.867				99.8394				171.156			Monkey W	330.624	162.674		Monkey W	171.904	171.904		Monkey W	354.922	350.77
	128.554				113.808				159.913				200.639	173.649			157.365	177.518			356.584	356.131
	85.0131				110.629				214.027				176.833	154.821			162.869	151.106			200.863	349.514
	113.889				103.78				14.7457				177.269	140.528			174.414	151.014			348.68	353.487
	91.0303				106.229				10.1088				177.551	166.046			155.636	161.816			256.012	349.553
	142.112				103.869				38.2429				198.741	149.131			156.208	155.644			202.728	317.808
	264.948				110.183				154.765				155.527	134.974			160.605	145.421			357.761	221.93
	139.078				102.824				36.2538				160.041	164.398			163.456	160.828			138.324	60.9408
Monkey W	188.126	169.753		Monkey W	159.369	167.55		Monkey W	295.614	309.278			164.01	162.618			158.08	204.81			139.592	343.464
	264.835	175.362			199.019	160.868			280.559	240.096			184.622	140.622			157.774	278.693			314.209	348.904
	190.518	176.11			254.904	161.529			317.403	155.106			295.437	45			151.106	344.059			247.055	326.603
	271.904	148.297			351.346	199.019			342.129	216.675			180.119	288.927			149.655	255.425			204.186	318.562
	358.293	135			47.6814	254.904			322.667	357.939			285.319	322.839			145.421	200.021			141.829	327.584
	6.22506	146.451			48.8216	351.346			327.295	356.064			190.244	27.7363			157.57	44.2724			356.842	338.422
	307.704	191.198			54.8127	334.523			28.7575	271.749			190.582	45			160.844	40.2691			321.73	352.805
	36.722	46.1264			54.5931	48.1876			65.8165	2.20323			194.227	28.7344			161.154	39.8309			359.249	330.67
	9.23778	48.2854			46.5708	46.3969			310.612	14.4943			195.599	9.91555			156.493	43.3125			323.872	332.929
	351.315	45.6103			47.8808	49.5468			252.892	14.5817			45.6733	2.12116			204.81	43.5587			320.194	333.817
	85.1964	135			117.902	54.5931			303.435	1.88848			350.196	11.189			190.314	43.6048			343.312	319.962
		45.5091				39.1807				80.4069			168.811	21.7479			180.131	43.3257			354.825	341.272
		21.0076				109.259				6.32834			186.268	32.8955			290.255	40.0909			352.036	353.878
		180				99.4535				80.5465			234.002	17.0221			36.6488	46.3519			158.72	343.581
													201.952	22.3506			359.225	49.4213			43.2733	359.392
													288.169	45			277.104	36.9626			13.9641	3.715
													284.494	355.984			286.733	42.2349			2.85568	4.22949
													274.474	18.4142			272.637	44.597			21.9154	3.56988
													36.4406	1.77705			258.116	41.8146			42.533	33.5019
													59.1366	358.815			279.544	43.5784			5.93097	122.818
													206.359	21.9474			252.151	40.6749			26.8482	4.73085
													280.439	36.3464			238.437	42.4681			144.331	8.03737
													148.211	45			261.156	40.4779			30.4644	313.749
													318.065	120.552			21.4161	119.017			139.899	315.237
													188.245	117.721			344.059	114.095			32.6744	4.5221
													37.254	124.101			255.425	118.674			29.7382	1.53468
													287.853	135			200.021	34.1466			33.0725	3.62647
													187.872	121.319			191.03	112.437			39.1056	5.4272
													14.7895	85.7401			53.0597	102.159			159.882	100.853
													203.813	105.8			35.9563	100.365			197.353	8.88177
													243.663	100.919			56.1047	101.526			11.0651	5.43496
													201.301	105.485			45.2922	100.067			1.83779	5.41801
													222.424	112.531			46.5811	101.905			42.0021	10.6263
													292.496	111.258			53.1789	100.967			296.648	10.2911
													266.057	122.451			40.2691	109.215			87.8327	13.2358
													300.18	124.883			33.0547	118.733			167.857	6.1505
													45.6697	106.328			46.4207	105.09			187.558	1.23827
													10.9272				47.0548				156.009
													219.569				43.3257				175.843
													242.105				46.3519				239.317
													204.934				49.4213				225.787
													279.329				47.9057				267.126
													334.889				48.5897				176.243
													8.9387				48.7451				195.753
													121.002				25.8567				155.512
													265.25				36.9626				231.423
													268.579				31.9184				286.299
													248.274				40.2174				95.1454
													257.328				45.9253				228.288
													87.3934				42.2349				236.66
													332.134				34.3009				208.057
													227.226				44.597				211.403
													341.68				41.2706				45.1585
													25.3412				42.0296				297.833
													249.061				39.2839				182.629
													223.791				40.6749				300.41
													247.318				38.0593				209.777
													264.414				42.4681				183.116
													265.365				40.4779				209.259
													296.994				40.91				221.946
													44.693				49.8682				224.887
													299.219				118.674				256.084
													229.075				34.1466				180.545
													275.451				98.45				194.929
													291.464				112.437				177.001
													119.755				113.887				179.028
													87.349				95.3125				5.86808
													277.651				101.905				175.746
													294.855				100.967				193.888
													297.905				109.215				188.69
													279.979				114.461				165.518
													319.855				118.733				201.122
													222.48				111.719				110.76

## Sheet: Statistics
Detailed statistics in Figure 4G.
Site	PD	Type of PStEs	Rayleigh test			V-test
			N	P value		N	P value
Rostral	Spinal PD	Facilitation	67	0.0012		67	1.38 × 10-4
		Suppression	37	8.69 × 10-4		37	1.84 × 10-4
	Background EMG PD	Facilitation	67	1.5 × 10-10		67	1.11 × 10-9
		Suppression	37	0.0023		37	3.75 × 10-4
	Normalized Spinal PD	Facilitation	67	6.94 × 10-12		67	4.84 × 10-12
		Suppression	37	2.75 × 10-7		37	1.03 × 10-7
Caudal	Spinal PD	Facilitation	111	2.21 × 10-8		111	3.73 × 10-9
		Suppression	93	3.23 × 10-16		93	7.77 × 10-16
	Background EMG PD	Facilitation	111	9.25 × 10-11		111	4.75 × 10-11
		Suppression	93	2.52 × 10-16		93	1.78 × 10-15
	Normalized Spinal PD	Facilitation	111	0.0247		111	0.0077
		Suppression	93	1.31 × 10-34		93	0
