# Supplementary material for: Tuning of motor outputs produced by spinal stimulation during voluntary control of torque directions in monkeys
Source: eLife. 2022 Dec 13;11:e78346. doi: 10.7554/eLife.78346 (PMC9747157; doi:10.7554/eLife.78346)
Supplement: Figure 4—source data 4. [file elife-78346-fig4-data4.xlsx]

## Sheet: Data
Data used to generate polar plots in Figure 4H.
Caudally-innervated muscles: Rostral site												Caudally-innervated muscles: Caudal site
Spinal PD				Background EMG PD				Normalized Spinal PD				Spinal PD				Background EMG PD				Normalized Spinal PD
	Facilitation	Suppression			Facilitation	Suppression			Facilitation	Suppression			Facilitation	Suppression			Facilitation	Suppression			Facilitation	Suppression
Monkey H	304.95	21.7277		Monkey H	16.785	9.23186		Monkey H	351.026	138.984		Monkey H	21.2275	57.582		Monkey H	14.3327	15.7169		Monkey H	335.768	349.676
	315.516	135			11.4211	356.016			323.383	332.535			258.172	77.1655			15.7169	14.1309			265.745	78.8877
	7.84449	359.81			16.8182	359.531			346.09	355.455			251.991	23.084			14.1309	8.65763			337.502	119.472
	53.3654	315			20.1985	4.46333			339.499	337.883			315.804	27.3737			7.20239	6.4366			340.533	54.0248
	87.4014	353.168			15.9864	330.749			318.858	320.226			308.281	0			10.9574	10.3239			311.556	56.0081
	319.555	299.027			356.172	326.492			250.711	346.541			311.262	26.0443			9.25037	3.54325			337.037	74.3596
	338.208	331.944			352.118	336.489			333.838	355.182			104.892	49.7494			8.90915	330.862			321.967	302.244
	335.516	315.392			356.016	337.509			312.105	347.374			280.893	93.1665			9.48014	333.695			139.88	97.1205
	344.691	314.813			4.90556	299.356			315.114	301.443			162.268	28.8252			10.3239	334.8			149.167	96.5036
	45.9019	264.303			6.06691	304.077			331.537	333.679			311.474	26.9033			335.706	330.895			282.039	101.618
	317.981	290.771			359.122	304.23			55.8532	325.804			236.607	45			330.862	330.64			281.802	105.529
	341.759	300.709			3.40549	305.527			340.219	50.6731			311.197	269.947			333.695	327.703			267.346	106.28
	131.315	288.033			4.46333	300.659			327.852	265.185			308.307	45			327.774	307.88			262.8	288.291
	221.46	92.0003			330.749	48.0034			323.283	244.372			284.24	45			332.684	308.496			302.286	344.26
	298.371	135			324.534	74.4273			321.98	261.598			304.644	352.068			327.606	301.209			357.17	309.513
	279.213	106.707			327.108	78.6218			348.782	331.904			294.702	45			332.735	303.382			338.594	342.586
	276.478	3.40303			321.364	61.9602			352.171	354.45			106.826	45			326.946	299.471			332.622	17.6026
	290.168	135			318.631	3.96131			315.28	355.437			120.062	46.411			330.895	300.131			339.745	354.984
	22.345	297.959			326.492	324.28			340.732	352.815			254.973	127.33			332.934	86.5466			175.892	350.13
	297.579	301.61			317.36	335.806			159.295	334.248			256.792	103.088			334.991	82.0022			241.454	199.498
	284.458	0			316.606	309.327			352.592	336.911			237.986	0			330.64	71.7092			287.887	342.117
	288.273	141.208			324.99	236.023			350.603	355.514			234.285	58.2238			331.485	73.9633			292.342	358.269
	295.337	135			333.357	250.628			359.893	294.204			310.648	21.4743			302.346	71.9614			305.952	353.96
	326.325	136.676			337.543	235.078			358.456	330.432			241.442	36.3283			299.156	53.7425			326.521	356.978
	325.926	149.215			333.755	177.311			351.83	292.122			308.857	0			307.88	342.397			22.7742	352.942
	285.844	171.015			330.564	176.565			340.3	293.036			292.064	345.118			294.894	350.135			359.427	355.968
	318.717	172.258			337.985	176.821			337.385	358.545			275.31	316.181			296.716	326.051			261.729	327.928
	136.805	228.826			337.509	203.544			316.209	355.727			268.047	45			295.425	205.502			222.603	359.496
	290.632	142.077			298.04	149.263			339.031	12.4959			278.901	315			299.155	197.003			355.381	342.198
	284.579	144.195			293.976	169.947			347.257	0.279079			323.121	164.045			308.496	181.928			325.61	352.484
	304.057	150.653			288.646	173.742			339.484	310.537			115.357	198.971			299.464	200.702			303.902	254.351
	289.813	179.185			289.92	183.671			341.112	22.4185			182.662	148.031			301.209	154.071			343.953	41.865
	289.949	225.023			291.493	189.504			198.896	15.4569			231.269	148.011			303.382	151.033			329.263	63.0346
	285.441	134.266			293.612	200.062			275.942	43.9968			231.812	165.218			299.471	172.275			277.397	14.4264
	274.934	177.566			294.635	207.134			299.871	60.5727			246.082	170.327			300.131	174.359			327.884	20.9371
	277.255	124.399			299.869	192.278			337.017	28.085			103.14	135			59.4374	167.072			335.193	22.501
	262.84	131.064			306.631	198.028			291.542	131.039			143.606	207.61			71.7092	208.115			313.555	50.8597
	286.694	196.414			307.662	197.869			305.87	25.2821			240.711	183.901			73.2884	201.703			295.427	40.7832
	295.709	315			308.452	274.149			312.769	35.5192			110.942	175.121			58.8448	182.637			338.62	21.0853
	273.424	304.345			293.94	308.618			327.401	40.8506			250.557	184.292			87.6318	180.235			350.147	117.997
	294.829				313.717				349.753				257.874	90			73.9633	195.649			337.526	4.05696
	139.555				300.659				347.754				70.1209	135			66.478	127.469			357.854	7.5308
	285.97				48.0034				329.806				217.522	315			54.7599	283.177			333.136	31.8227
	157.66				94.634				352.142				225.99				71.9614				270.377
	104.751				75.2658				195.583				322.769				356.248				356.988
	352.52				95.633				187.24				9.7624				346.988				330.927
	12.242				96.3002				306.46				312.324				312.897				340.605
	4.74772				64.8769				331.871				240.789				339.06				359.405
	30.9803				53.9633				335.534				357.334				309.893				258.316
	2.87303				71.3309				333.252				220.581				357.978				319.802
	8.17899				62.3091				287.634				267.506				238.277				305.329
	4.67606				51.9075				356.847				228.315				232.934				351
	143.3				60.3607				341.721				313.161				242.577				261.832
	352.549				57.1125				259.965				205.177				239.568				169.614
	346.006				310.157				262.671				173.193				229.291				193.923
	344.005				322.913				291.949				200.167				216.214				6.89482
	313.955				346.554				298.459				192.842				223.578				242.455
	346.749				0.599776				280.834				126.289				208.893				237.861
	299.132				309.379				326.055				201.972				234.088				308.602
	340.746				352.992				309.114				180.695				205.502				297.323
	323.653				353.846				319.687				162.346				208.792				302.011
	332.335				340.193				322.185				210.375				197.003				95.983
	190.838				355.255				329.854				162.596				227.169				271.413
	252.573				13.2585				358.024				305.765				181.928				151.945
	174.332				347.092				329.297				159.524				180.903				8.30195
	255.787				309.327				322.424				184.24				194.093				0.97713
	342.009				327.04				349.666				180.014				202.489				14.6243
	300.394				65.7245				311.322				201.233				203.379				43.7027
	288.186				316.315				334.396				172.566				199.43				71.8973
	293.359				317.825				316.032				113.153				202.776				167.422
	0.382413				0.0176563				354.862				210.505				213.517				52.097
	270.007				296.755				351.175				169.392				198.465				162.925
	228.039				300.405				187.735				181.872				201.267				183.91
	247.475				250.628				238.169				272.026				151.033				3.64289
	216.358				234.637				352.618				155.707				156.302				162.762
	143.148				243.182				314.947				181.415				174.844				154.029
	142.987				240.316				296.294				198.134				171.001				47.4415
	181.711				249.762				352.988				74.6369				176.321				29.2294
	181.139				242.679				337.449				188.162				177.037				70.5835
	184.224				263.391				261.022				130.435				170.632				13.3723
	176.396				210.341				145.272				203.182				162.661				123.837
	163.181				214.068				288.165				207.466				167.072				120.993
	181.591				221.904				304.095				341.87				208.115				6.57109
	183.451				221.266				33.1669				148.766				203.436				27.133
	179.166				209.312				71.415				217.849				177.119				11.1256
	217.275				219.251				339.785				263.894				187.972				40.5217
	180.45				211.153				39.835				251.84				195.649				40.3938
	312.041				177.311				338.353				239.704				183.302				133.756
	202.887				178.082				126.852				171.573				180.573				40.7292
	182.555				181.389				15.4109				207.767				183.642				75.9222
	193.547				189.516				237.966				293.752				127.469				56.1912
	198.164				190.76				63.0259				264.376				40.9757				56.4019
	213.001				198.624				29.4854				185.01				283.177				24.125
	210.541				202.932				256.887				101.803				292.189				166.283
	168.054				205.629				82.9395				93.7601				259.837				223.4
	202.678				213.012				295.436			Monkey W	91.0215	0.430279		Monkey W	15.9939	15.9939		Monkey W	347.162	344.436
	216.076				210.385				35.8485				223.226	358.572			0.943635	13.4976			357.464	359.056
	208.565				198.76				21.0921				16.1262	0			15.7195	0.943635			339.089	358.114
	350.566				149.263				346.15				27.0025	12.3842			10.3322	14.2705			341.197	19.3107
	128.605				177.284				239.314				11.4168	16.0191			24.2544	15.958			224.479	23.6794
	149.432				175.036				14.969				20.8699	35.0363			23.4062	15.6451			243.3	356.261
	199.913				176.243				234.669				350.123	25.2153			10.651	17.8531			188.956	33.1713
	203.592				172.714				0.364756				40.9491	50.8396			25.5706	20.6918			194.058	41.5482
	132.662				176.631				134.73				260.58	44.1424			23.6084	27.2773			144.258	113.341
	182.536				173.266				24.8059				348.769	45			26.6705	26.9593			165.771	58.0395
	192.067				175.032				1.1663				290.846	47.7205			32.2908	28.9868			358.344	69.2422
	172.021				177.159				4.03151				8.84401	354.527			29.7547	345.056			320.205	58.6474
	165.499				174.324				7.404				2.06178	3.04015			20.865	343.729			304.433	108.986
	214.244				175.854				14.3775				200.799	0			336.321	336.321			348.949	37.2249
	239.721				207.134				7.60916				223.861	332.868			340.561	336.607			316.918	353.116
	224.189				192.278				5.69069				186.67	341.844			357.715	329.229			243.703	342.597
	228.393				189.451				9.80508				187.485	4.77484			353.426	331.604			343.866	145.279
	231.956				198.028				201.303				120.865	11.1061			336.607	329.558			302.882	133.29
	2.04354				174.308				23.6699				135	80.7983			329.229	327.457			334.751	114.346
	53.0692				174.9				30.8784				354.928	40.0595			329.17	342.02			331.548	340.965
	223.76				189.884				9.27041				331.881	45			333.537	335.758			205.726	87.5672
	178.539				185.922				17.0348				295.962	45			335.758	346.353			306.144	76.1562
	134.976				180.029				38.3903				290.785	86.5042			346.353	337.519			157.181	356.953
	127.844				191.551				32.5869				326.943	0.502369			337.994	323.277			240.204	124.864
	192.281				199.294				31.9114				289.188	303.847			332.269	310.73			302.332	247.583
	157.106				179.657				38.9416				206.98	282.392			323.277	299.796			286.649	349.508
	308.476				224.714				33.9279				305.624	93.1852			321.758	307.906			329.086	353.949
	284.438				155.28				33.8757				258.98	77.8903			316.098	304.6			338.694	176.44
	114.505				112.496				83.7617				283.249	57.1099			308.498	302.764			322.108	164.595
	284.393				277.611				129.158				279	287.783			307.452	306.818			354.804	167.798
	288.308				283.975				2.00932				169.816	45			324.09	317.433			342.592	352.681
	307.468				296.98				6.78188				270.422	34.0303			324.277	317.874			341.399	154.974
	226.785				325.763				4.33251				107.911	57.9912			310.73	37.2067			334.213	358.319
	279.458				118.207				10.4881				180	112.862			299.796	41.0741			357.023	357.579
	93.8903				308.618				161.252				353.527	85.1412			307.635	75.5293			341.201	184.393
Monkey W	349.624	61.2691		Monkey W	26.5919	21.4455		Monkey W	342.965	31.3478			250.238	63.0271			307.906	66.0741			341.828	158.474
	1.53603	46.6484			18.5707	19.0825			43.096	20.5034			231.249	112.147			304.6	73.0728			53.6319	184.529
	31.6423	15.802			27.771	344.454			164.094	349.04			271.85	85.3938			302.764	68.5013			49.8794	353.807
	312.56	7.12145			312.115	346.618			146.632	336.666			285.595	93.9166			306.901	72.4896			317.231	355.031
	85.1017	348.357			77.8176	343.799			349	331.566			279.541	87.4388			317.433	71.2638			112.615	351.95
	19.0549	298.003			335.959	308.963			32.5421	344.028			306.522	91.2456			311.718	83.2062			294.724	231.63
	237.496	315.111			224.756	308.29			316.921	270.045			294.568	83.0663			311.976	79.5323			355.752	168.969
	233.019	285.886			226.987	309.22			323.032	307.054			294.827	112.705			313.428	28.9378			303.825	345.725
	3.94029	64.0231			199.846	92.4569			3.87134	359.373			305.738	79.9524			331.524	46.9209			298.468	169.527
	233.826	123.297			201.232	84.4728			0.444725	344.268			233.74	91.5976			37.2067	61.7429			351.034	162.612
	15.8155	71.638			229.184	59.1937			7.28406	39.8236			130.571	126.009			39.7344	68.436			140.355	189.748
	211.685	26.5374			222.685	42.5092			12.7408	27.5659			106.19	103.039			63.8572	32.1968			333.126	354.837
	249.647	48.3448			220.757	43.483			6.03133	4.55736			106.796	141.687			65.2193	35.2568			308.08	35.7864
	3.41119	45.5824			330.869	41.7122			32.5932	6.82069			100.203	107.005			53.9408	342.141			358.017	353.59
	296.294	240.567			339.372	330.522			28.8906	38.8241			180	230.804			66.0741	343.221			189.578	348.873
		251.286				235.184				12.4443			65.5225	226.63			68.4991	237.123			354.129	326.318
		274.679				228.459				4.86175			313.731	231.246			73.0728	228.273			348.495	76.7099
		250.816				232.148				3.87023			231.672	225.321			68.5013	231.372			352.971	345.075
		244.769				238.515				16.1019			225.03	52.2004			72.4896	235.761			346.245	0.0611247
		256.737				236.253				46.2202			64.4077	38.7485			83.2062	234.154			358.32	19.3912
		243.97				236.626				18.6681			104.77	42.0129			77.7754	234.215			324.578	7.36216
		183.322				236.267				6.25421			93.8889	247.915			75.1192	236.003			128.378	30.1478
		207.516				208.143				20.4846			101.581	229.432			65.4574	236.752			358.301	16.8651
		209.365				199.846				7.34455			127.297	46.9931			70.9042	252.019			340.767	18.0407
		212.348				203.732				9.51823			67.0365	225.762			62.0655	227.443			350.503	18.7337
		233.387				229.184				8.61587			107.625	227.391			78.6523	229.812			347.083	9.47177
		226.228				222.685				4.20323			309.632	52.5173			64.1104	228.124			343.135	12.6148
		244.771				226.435				3.54249			330.856	28.0157			29.5205	229.542			326.573	20.7845
		212.308				228.039				18.3358			358.841	51.8685			68.436	227.339			353.756	71.788
		341.95				340.108				1.84221			253.124	232.784			31.247	230.202			142.452	9.61186
		339.863				330.939				8.92349			251.857	226.594			33.2841	232.788			337.318	39.0741
													17.0848	220.514			35.2568	225.483			338.298	16.8925
													3.83591	198.264			310.204	195.498			307.415	21.427
													4.54914	194.544			314.67	202.594			351.615	16.175
													299.372	61.0548			342.141	189.425			355.927	8.03935
													95.8365	0			343.221	191.031			347.684	3.53401
													278.821	199.851			344.097	198.392			354.124	83.767
													290.798	180			295.046	194.275			174.211	33.0315
													292.948	201.066			349.123	196.58			253.42	29.8547
													280.326	59.8018			341.858	250.275			353.235	57.5726
													228.626	280.322			237.593	236.504			350.054	70.8419
													17.4774	225			237.123	216.373			218.379	106.431
													215.339	226.846			242.214	218.3			336.53	2.97248
													259.834	12.6521			232.56	210.041			335.199	11.9122
													265.722	40.7983			252.667	211.051			316.146	2.58224
													187.195	272.461			239.115	214.021			327.374	2.7658
													225.227	215.406			227.21	220.568			249.914	1.45851
													57.851	339.685			228.273	332.077			335.78	4.4865
													249.104	5.90478			227.797	330.118			229.947	43.8182
													229.89	307.446			235.761	313.856			143.486	8.62723
													222.649	301.237			234.154	312.365			301.105	8.5459
													227.186	279.607			234.215	313.289			315.789	58.4402
													271.228	45			242.331	328.29			301.445	7.60714
													230.015				243.769				288.806
													264.737				262.192				309.315
													236.02				237.7				273.572
													274.479				239.959				75.0276
													251.674				239.498				222.282
													197.927				233.348				0.406746
													5.12949				236.752				16.6703
													250.32				252.019				339.472
													233.372				252.605				15.3785
													241.51				251.006				236.972
													238.699				251.616				322.099
													250.247				267.112				258.556
													212.295				245.722				25.7588
													225.806				232.05				45.8921
													9.89458				227.443				196.533
													233.396				226.734				90.8365
													205.441				228.124				42.3331
													230.033				229.542				41.577
													232.85				227.339				46.2623
													215.011				236.714				113.926
													192.882				245.467				240.658
													222.571				230.956				163.171
													235.632				232.848				152.54
													229.938				234.011				26.9943
													212.796				225.113				18.7697
													217.582				202.211				36.124
													198.858				204.734				56.3926
													209.893				193.097				4.97103
													225.395				204.285				28.9729
													231.1				222.015				245.522
													214.455				195.347				301.336
													222.208				202.913				290.405
													9.70978				195.498				221.877
													207.673				190.984				218.573
													210.877				189.425				27.2746
													208.448				191.031				13.0559
													213.31				192.132				21.3067
													259.897				185.657				28.8969
													216.594				199.414				2.54481
													201.556				200.423				34.5203
													220.65				203.09				12.1765
													201.204				193.686				6.66152
													90				196.58				0.490997
													258.498				250.275				5.51107
													245.602				240.259				2.78336
													230.058				236.823				15.3704
													264.016				258.949				16.7964
													242.207				229.181				21.1102
													236.175				227.68				9.08552
													358.656				216.373				19.1074
													329.355				218.3				19.2957
													260.856				216.708				16.6893
													219.678				210.041				21.4521
													248.066				211.051				17.4166
													259.59				205.551				21.178
													213.527				208.746				74.2401
													196.328				206.274				17.1798
													222.796				220.966				1.13272
													236.493				220.81				17.5599
													250.406				226.282				7.5185
													226.844				213.421				8.22346
													190.456				332.077				5.34264
													310.308				333.778				5.06773
													305.951				330.751				13.0262
													288.097				331.951				8.4942
													293.77				326.396				142.284
													200.38				310.466				111.055
													290.433				314.654				44.148
													183.803				313.856				9.63722
													95.8508				312.365				37.0156
													267.199				326.094				54.0398
													278.078				322.289				4.78055
													266.685				325.24				1.82945
													252.107				323.301				15.6826
													282.196				332.881				24.1241
													238.576				325.005				13.4226

## Sheet: Statistics
Detailed statistics in Figure 4H.
Site	PD	Type of PStEs	Rayleigh test			V-test
			N	P value		N	P value
Rostral	Spinal PD	Facilitation	145	1.14 × 10-6		145	2.77 × 10-7
		Suppression	71	0.2985
	Background EMG PD	Facilitation	145	9.83 × 10-5		145	2.86 × 10-5
		Suppression	71	0.0069		71	0.002
	Normalized Spinal PD	Facilitation	145	3.81 × 10-28		145	0
		Suppression	71	2.59 × 10-23		71	0
Caudal	Spinal PD	Facilitation	259	6.32 × 10-23		259	0
		Suppression	131	1.03 × 10-6		131	1.07 × 10-7
	Background EMG PD	Facilitation	259	1.03 × 10-11		259	1.92 × 10-11
		Suppression	131	1.84 × 10-4		131	2.48 × 10-5
	Normalized Spinal PD	Facilitation	259	4.47 × 10-28		259	0
		Suppression	131	7.86 × 10-21		131	0
