# Supplementary material for: Tuning of motor outputs produced by spinal stimulation during voluntary control of torque directions in monkeys
Source: eLife. 2022 Dec 13;11:e78346. doi: 10.7554/eLife.78346 (PMC9747157; doi:10.7554/eLife.78346)
Supplement: Figure 7—source data 1. [file elife-78346-fig7-data1.xlsx]

## Sheet: Data
Data used to generate bar plots in Figure 7E.
< 150 μA	150-750 μA	750-1350 μA	³ 1350 μA
0.478316	0.999734	8.66682	13.9487
0.33749	1.50512	3.00984	2.17267
0.656069	1.15847	5.04654	12.0969
0.358455	0.931181	1.45947	2.89484
0.273384	0.324693	0.285477	12.7697
0.113222	0.661219	1.07457	2.52976
0.190695	0.240734	0.433489	14.0946
0.203068	0.956952	0.940953	2.45332
0.34096	0.536522	0.311185	15.4088
0.572697	0.422528	0.240368	1.82744
0.282341	0.316443	0.140736	14.6549
0.418825	0.754328	2.89349	1.41522
0.0912235	1.69718	0.457475	14.3814
0.243957	1.79454	0.410288	1.42005
0.463352	0.950776	5.96686	14.0055
0.232902	0.569603	2.9766	2.28275
0.150529	1.09011	4.94229
0.204519	0.629508	1.94623
0.315614	0.194694	1.25537
0.525416	0.255773	0.314534
0.308945	0.21029	0.886073
0.135672	0.474962	0.364442
0.208634	0.892124	0.276887
0.405328	1.23867	0.240527
0.6192	0.725389	3.49052
0.869625	0.463541	0.765177
0.421868	0.89422	0.239395
0.279969	0.524586	6.35557
0.132825	0.425425	1.83162
0.134168	0.296807	2.87145
0.371741	0.497546	0.590582
1.24101	0.368872	0.409599
0.210005	0.781915	0.786301
0.727673	1.37542	0.416306
0.402624	0.358198	0.270165
0.2974	0.239557	1.07989
0.175613	0.284593	0.413379
0.186364	0.710706	0.531483
0.721425	1.81259	0.276617
0.242249	2.1134	3.1273
0.150462	0.522729	0.537928
0.682921	0.525112	0.295811
0.369367	2.01665	10.1412
0.131029	0.457213	2.42732
0.160328	0.195123	1.85974
0.16741	0.27006	1.44849
0.554682	1.41536	0.631829
0.457985	3.27072	0.965168
0.341247	2.65047	0.490575
0.121583	0.879562	0.258953
0.337859	0.640571	1.05089
	1.96581	0.381498
	0.660121	0.452021
	0.372649	0.303292
	0.193226	2.31329
	0.304161	0.571559
	2.44471	0.519266
	3.29441	10.732
	2.97474	5.32125
	0.847897	1.87693
	0.77489	0.721867
	1.98631	0.758728
	0.693492	1.4422
	0.186263	0.293216
	0.388479	0.705447
	0.267713	0.189398
	1.94292	0.242613
	3.41899	0.222167
	1.69609	1.77082
	0.889893	0.70392
	0.903294	0.576387
	1.23346	10.6559
	0.500747	6.51807
	0.441266	3.32726
	0.218164	0.557952
		1.09558
		1.55845
		0.54435
		0.495654
		0.206016
		0.299056
		0.225974
		1.29222
		0.663201
		0.602071
		13.0371
		6.52129
		4.22812
		2.0437
		0.750761
		1.34026
		0.59541
		0.464644
		0.219457
		1.71141
		0.568967
		0.511496
		8.63091
		3.86508
		5.124
		0.880048
		0.324848
		1.44957
		0.456216
		0.620475
		2.65178
		0.318447
		0.455584

## Sheet: Statistics
Detailed statistics in Figure 7E.
One-way ANOVA	Pair of post-hoc tests	P value
F (3, 246) = 47.8		2.23 × 10-24
	< 150 μA vs 150-750 μA	0.474
	< 150 μA vs 750-1350 μA	6.52 × 10-4
	< 150 μA vs ³ 1350 μA	3.77 × 10-9
	150-750 μA vs 750-1350 μA	0.043
	150-750 μA vs ³ 1350 μA	3.77 × 10-9
	750-1350 μA vs ³ 1350 μA	3.77 × 10-9
Tukey-Kramer test was conducted for post-hoc tests.
