# Supplementary material for: Tuning of motor outputs produced by spinal stimulation during voluntary control of torque directions in monkeys
Source: eLife. 2022 Dec 13;11:e78346. doi: 10.7554/eLife.78346 (PMC9747157; doi:10.7554/eLife.78346)
Supplement: Figure 7—source data 2. [file elife-78346-fig7-data2.xlsx]

## Sheet: Data
Data used to generate polar plots in Figure 7F.
Evoked torque						Normalized torque
	< 150 μA	150-750 μA	750-1350 μA	³ 1350 μA			< 150 μA	150-750 μA	750-1350 μA	³ 1350 μA
Monkey H	183.811	265.664	326.804	219.304		Monkey H	183.811	265.664	326.804	219.304
	329.771	254.407	352.796	224.314			329.771	254.407	352.796	179.314
	260.29	224.893	276.347	226.15			215.29	179.893	276.347	136.15
	250.037	283.471	253.996	235.894			205.037	193.471	253.996	100.894
	319.759	242.779	216.217	214.59			292.746	152.779	216.217	34.5899
	318.416	280.535	228.841	227.971			229.759	145.535	228.841	317.579
	260.07	191.718	212.141	227.579			183.416	354.999	212.141	255.873
	351.33	231.612	339.476	210.873			125.07	11.7176	339.476	2.97127
	359.9	254.121	238.326				171.33	358.722	331.278
	300.739	223.722	251.578				179.9	299.414	193.326
	347.803	209.414	229.609				120.739	350.348	206.578
	184.804	260.348	234.6				274.804	354.421	184.609
	204.15	309.421	222.058				294.15	297.651	189.6
	249.712	252.651	346.936				339.712	15.6797	177.058
	301.561	60.6797	181.995				346.561	3.10678	354.521
	163.706	48.1068	180.809				163.706	16.1641	355.554
	22.7459	151.164	234.449				139.252	6.61198	256.936
	4.2518	174.999	249.015				144.249	29.1213	91.9952
	9.2486	20.6851	250.897				122.803	110.685	90.8088
	136.924		263.298				181.924		144.449
			236.668						159.015
			228.788						160.897
			181.537						173.298
			226.152						146.668
			248.135						138.788
			260						316.572
			270.739						279.959
			233.264						46.5374
			232.523						91.152
			185.441						113.135
			181.586						125
			185.614						135.739
			221.493						98.2636
			262.235						97.5228
			287.44						273.772
			225.274						50.4413
			216.474						242.348
			186.001						1.5859
			354.224						5.61414
			198.228						41.4927
			201.229						82.2351
			243.61						107.44
			244.838						45.2744
			241.778						36.4738
			213.503						223.946
			210.991						357.757
			355.165						6.00059
			223.748						333.228
			214.73						336.229
			206.941						348.503
			202.194						345.991
			232.198						358.748
			252.233						349.73
			221.692						296.941
			349.288						292.194
			235.286						322.198
			220.049						342.233
			327.317						311.692
			346.985						325.286
			291.856						310.049
			263.755						336.856
			332.815						308.755
			296.522						341.522
			43.4442						43.4442
			19.021						19.021
			0.0101402						0.0101402
			48.4566						3.45658
			16.2784						4.77653
			39.5209						8.32819
			49.7765						86.6129
			40.5537						44.5053
			46.5723						25.9539
			98.3282						129.224
			176.613						18.61
			54.9589						19.8385
			179.505						16.7777
			48.7717						130.165
			160.954						143.295
			62.3483						79.2879
			43.9462						72.3894
			177.757						12.3172
			53.295						31.9846
			27.3894						55.2381
			10.2381						17.8153
Monkey W	211.866	346.246	211.636	214.579		Monkey W	211.866	346.246	211.636	214.579
	187.419	305.007	299.596	217.661			187.419	305.007	299.596	172.661
	188.228	346.037	354.299	203.156			188.228	346.037	354.299	113.156
	191.821	207.234	220.129	204.78			191.821	207.234	175.129	69.7803
	356.865	341.199	289.391	206.822			356.865	341.199	244.391	26.8219
	240.336	247.175	201.446	211.907			195.336	247.175	317.231	346.907
	246.991	347.432	227.344	219.6			201.991	347.432	111.446	309.6
	208.623	245.777	206.428	213.191			163.623	245.777	137.344	258.191
	230.964	311.705	229.079				185.964	329.708	290.537
	292.445	232.813	217.987				202.445	331.355	71.4275
	266.833	252.108	213.974				176.833	338.919	94.0792
	352.004	320.221	222.134				217.004	342.458	82.9868
	347.277	219.299	336.522				212.277	266.705	33.9745
	336.535	254.548	209.23				201.535	187.813	42.1339
	358.748	183.635	231.25				178.748	207.108	156.522
	192.922	272.07	323.239				12.9215	319.094	344.23
	354.762	205.294	231.723				187.382	312.734	321.723
	238.24	202.838	217.635				196.861	339.44	307.635
	257.83	204.836	292.294				347.83	334.777	263.63
	248.963	195.691	218.63				293.963	230.221	274.873
	7.38241	183.625	229.873				129.762	129.299	6.24981
	16.861	193.002	345.615				13.2401	164.548	98.2391
	39.1336	191.882	2.23111				174.134	342.518	22.2938
	54.6654	296.929	20.5371				189.665	356.428	30.615
	58.1929	251.481					193.193	48.6352
	103.324	239.64					193.324	137.07
	74.6823	251.989					164.682	25.2942
	86.4016	224.386					176.402	22.8378
	68.1613	226.363					158.161	24.8359
	155.539	245.462					200.539	15.6913
	116.261	285.64					161.261	3.62534
		266.467						13.0024
		243.4						11.8824
		302.488						359.386
		267.201						356.467
		228.338						333.4
		257.268						357.201
		310.681						318.338
		301.625						347.268
		298.553						355.681
		345.179						346.625
		332.187						343.553
		328.547						356.647
		311.647						10.8324
		10.8324						24.4494
		14.7079						71.9289
		16.3549						26.4814
		23.9189						14.6402
		27.4584						26.9885
		49.0939						1.36329
		42.7342						20.4624
		69.4404						15.64
		64.7775						32.488
		159.449						30.1789
		117.518						17.1867
		131.428						13.5472

## Sheet: Statistics
Detailed statistics in Figure 7F.
Current		Rayleigh test			V-test
		N	P value		N	P value
< 150 μA	Evoked Torque	51	0.1515
	Normalized Torque	51	3.65 × 10-8		51	1.8 × 10-5
150-750 μA	Evoked Torque	75	1.8 × 10-6		75	2.81 × 10-7
	Normalized Torque	75	1.44 × 10-11		75	7.23 × 10-12
750-1350 μA	Evoked Torque	108	5.38 × 10-9		108	1.56 × 10-9
	Normalized Torque	108	3.92 × 10-4		108	6.85 × 10-5
³ 1350 μA	Evoked Torque	16	5.99 × 10-11		16	1.15 × 10-8
	Normalized Torque	16	0.9993
